# Supplementary material for: The Frequency of, and Factors Associated with Prolonged Hospitalization: A Multicentre Study in Victoria, Australia
Source: PubMed Central journal article supplement (PMC7564707; doi:10.3390/jcm9093055), 2020-09-22
Supplement: jcm-09-03055-s001.pdf [file jcm-09-03055-s001.pdf]

## **Supplementary materials**

**Table S1:** Diagnostic related group (DRG) Codes for different specialties

| <b>Specialty</b>          | <b>DRG Code</b> | <b>Description</b>                                                          |
|---------------------------|-----------------|-----------------------------------------------------------------------------|
| Clinical Cardiology       | F40A            | Circulatory Disorders W Ventilator Support, Major Complexity                |
| Clinical Cardiology       | F40B            | Circulatory Disorders W Ventilator Support, Minor Complexity                |
| Clinical Cardiology       | F42C            | Circulatory Dsrds, Not Adm for AMI W Invasive Cardiac Inves, Sameday        |
| Clinical Cardiology       | F43A            | Circulatory Disorders W Non-Invasive Ventilation, Major Complexity          |
| Clinical Cardiology       | F43B            | Circulatory Disorders W Non-Invasive Ventilation, Minor Complexity          |
| Clinical Cardiology       | F43Z            | Circulatory Disorders W Non-Invasive Ventilation                            |
| Clinical Cardiology       | F60A            | Circulatory Dsrds, Adm for AMI W/O Invas Card Inves Proc                    |
| Clinical Cardiology       | F60B            | Circulatory Dsrds, Adm for AMI W/O Invas Card Inves Proc, Transf <5 Days    |
| Clinical Cardiology       | F61A            | Infective Endocarditis, Major Complexity                                    |
| Clinical Cardiology       | F61B            | Infective Endocarditis, Minor Complexity                                    |
| Clinical Cardiology       | F62A            | Heart Failure and Shock, Major Complexity                                   |
| Clinical Cardiology       | F62B            | Heart Failure and Shock, Minor Complexity                                   |
| Clinical Cardiology       | F62C            | Heart Failure and Shock, Transferred <5 Days                                |
| Clinical Cardiology       | F63A            | Venous Thrombosis, Major Complexity                                         |
| Clinical Cardiology       | F63B            | Venous Thrombosis, Minor Complexity                                         |
| Clinical Cardiology       | F66A            | Coronary Atherosclerosis, Major Complexity                                  |
| Clinical Cardiology       | F66B            | Coronary Atherosclerosis, Minor Complexity                                  |
| Clinical Cardiology       | F67A            | Hypertension, Major Complexity                                              |
| Clinical Cardiology       | F67B            | Hypertension, Minor Complexity                                              |
| Clinical Cardiology       | F68A            | Congenital Heart Disease, Major Complexity                                  |
| Clinical Cardiology       | F68B            | Congenital Heart Disease, Minor Complexity                                  |
| Clinical Cardiology       | F68Z            | Congenital Heart Disease                                                    |
| Clinical Cardiology       | F69A            | Valvular Disorders, Major Complexity                                        |
| Clinical Cardiology       | F69B            | Valvular Disorders, Minor Complexity                                        |
| Clinical Cardiology       | F72A            | Unstable Angina, Major Complexity                                           |
| Clinical Cardiology       | F72B            | Unstable Angina, Minor Complexity                                           |
| Clinical Cardiology       | F74A            | Chest Pain, Major Complexity                                                |
| Clinical Cardiology       | F74B            | Chest Pain, Minor Complexity                                                |
| Clinical Cardiology       | F75A            | Other Circulatory Disorders, Major Complexity                               |
| Clinical Cardiology       | F75B            | Other Circulatory Disorders, Intermediate Complexity                        |
| Clinical Cardiology       | F75C            | Other Circulatory Disorders, Minor Complexity                               |
| Clinical Cardiology       | F76A            | Arrhythmia, Cardiac Arrest and Conduction Disorders, Major Complexity       |
| Clinical Cardiology       | F76B            | Arrhythmia, Cardiac Arrest and Conduction Disorders, Minor Complexity       |
| Clinical Cardiology       | F76C            | Arrhythmia, Cardiac Arrest and Conduction Disorders, Sameday                |
| Interventional Cardiology | F01A            | Implantation and Replacement of AICD, Total System, Major Complexity        |
| Interventional Cardiology | F01B            | Implantation and Replacement of AICD, Total System, Minor Complexity        |
| Interventional Cardiology | F02Z            | Other AICD Procedures                                                       |
| Interventional Cardiology | F10A            | Interventional Coronary Procedures, Admitted for AMI, Major Complexity      |
| Interventional Cardiology | F10B            | Interventional Coronary Procedures, Admitted for AMI, Minor Complexity      |
| Interventional Cardiology | F12A            | Implantation and Replacement of Pacemaker, Total System, Major Complexity   |
| Interventional Cardiology | F12B            | Implantation and Replacement of Pacemaker, Total System, Minor Complexity   |
| Interventional Cardiology | F15A            | Interventional Coronary Procs, Not Adm for AMI, W Stent Implant, Major Comp |
| Interventional Cardiology | F15B            | Interventional Coronary Procs, Not Adm for AMI, W Stent Implant, Minor Comp |

|                           |      |                                                                                 |
|---------------------------|------|---------------------------------------------------------------------------------|
| Interventional Cardiology | F16A | Interventional Coronary Procs, Not Adm for AMI, W/O Stent Implant, Major Comp   |
| Interventional Cardiology | F16B | Interventional Coronary Procs, Not Adm for AMI, W/O Stent Implant, Minor Comp   |
| Interventional Cardiology | F17A | Insertion and Replacement of Pacemaker Generator, Major Complexity              |
| Interventional Cardiology | F17B | Insertion and Replacement of Pacemaker Generator, Minor Complexity              |
| Interventional Cardiology | F17Z | Insertion or Replacement of Pacemaker Generator                                 |
| Interventional Cardiology | F18A | Other Pacemaker Procedures, Major Complexity                                    |
| Interventional Cardiology | F18B | Other Pacemaker Procedures, Minor Complexity                                    |
| Interventional Cardiology | F19A | Trans-Vascular Percutaneous Cardiac Intervention, Major Complexity              |
| Interventional Cardiology | F19B | Trans-Vascular Percutaneous Cardiac Intervention, Minor Complexity              |
| Interventional Cardiology | F41A | Circulatory Disorders, Adm for AMI W Invasive Cardiac Inves Proc, Major Comp    |
| Interventional Cardiology | F41B | Circulatory Disorders, Adm for AMI W Invasive Cardiac Inves Proc, Minor Comp    |
| Interventional Cardiology | F42A | Circulatory Dsrds, Not Adm for AMI W Invasive Cardiac Inves Proc, Major Comp    |
| Interventional Cardiology | F42B | Circulatory Dsrds, Not Adm for AMI W Invasive Cardiac Inves Proc, Minor Comp    |
| Dermatology               | J67A | Minor Skin Disorders, Major Complexity                                          |
| Dermatology               | J67B | Minor Skin Disorders, Minor Complexity                                          |
| Dermatology               | J68A | Major Skin Disorders, Major Complexity                                          |
| Dermatology               | J68B | Major Skin Disorders, Minor Complexity                                          |
| Dermatology               | J68C | Major Skin Disorders, Sameday                                                   |
| Dermatology               | K09C | Other Endocrine, Nutritional and Metabolic OR Procs W/O CC                      |
| Endocrinology             | K60A | Diabetes, Major Complexity                                                      |
| Endocrinology             | K60B | Diabetes, Minor Complexity                                                      |
| Endocrinology             | K60C | Diabetes, Sameday                                                               |
| Endocrinology             | K61Z | Severe Nutritional Disturbance                                                  |
| Endocrinology             | K62A | Miscellaneous Metabolic Disorders, Major Complexity                             |
| Endocrinology             | K62B | Miscellaneous Metabolic Disorders, Intermediate Complexity                      |
| Endocrinology             | K62C | Miscellaneous Metabolic Disorders, Minor Complexity                             |
| Endocrinology             | K63A | Inborn Errors of Metabolism, Major Complexity                                   |
| Endocrinology             | K63B | Inborn Errors of Metabolism, Minor Complexity                                   |
| Endocrinology             | K64A | Endocrine Disorders, Major Complexity                                           |
| Endocrinology             | K64B | Endocrine Disorders, Minor Complexity                                           |
| Endocrinology             | K64C | Endocrine Disorders, Sameday                                                    |
| Gastroenterology          | G61A | Gastrointestinal Haemorrhage, Major Complexity                                  |
| Gastroenterology          | G61B | Gastrointestinal Haemorrhage, Minor Complexity                                  |
| Gastroenterology          | G64A | Inflammatory Bowel Disease, Major Complexity                                    |
| Gastroenterology          | G64B | Inflammatory Bowel Disease, Minor Complexity                                    |
| Gastroenterology          | G67A | Oesophagitis and Gastroenteritis, Major Complexity                              |
| Gastroenterology          | G67B | Oesophagitis and Gastroenteritis, Minor Complexity                              |
| Gastroenterology          | H40A | Endoscopic Procedures for Bleeding Oesophageal Varices, Major Complexity        |
| Gastroenterology          | H40B | Endoscopic Procedures for Bleeding Oesophageal Varices, Intermediate Complexity |
| Gastroenterology          | H40C | Endoscopic Procedures for Bleeding Oesophageal Varices, Minor Complexity        |
| Gastroenterology          | H60A | Cirrhosis and Alcoholic Hepatitis, Major Complexity                             |
| Gastroenterology          | H60B | Cirrhosis and Alcoholic Hepatitis, Intermediate Complexity                      |
| Gastroenterology          | H60C | Cirrhosis and Alcoholic Hepatitis, Minor Complexity                             |
| Gastroenterology          | H63A | Other Disorders of Liver, Major Complexity                                      |

|                         |      |                                                                             |
|-------------------------|------|-----------------------------------------------------------------------------|
| Gastroenterology        | H63B | Other Disorders of Liver, Intermediate Complexity                           |
| Gastroenterology        | H63C | Other Disorders of Liver, Minor Complexity                                  |
| Gastroenterology        | K40A | Endoscopic and Investigative Procedures for Metabolic Disorders, Major Comp |
| Gastroenterology        | K40B | Endoscopic and Investigative Procedures for Metabolic Disorders, Minor Comp |
| Gastroenterology        | K40C | Endoscopic and Investigative Procs for Metabolic Disorders, Sameday         |
| Gastroenterology        | K61A | Severe Nutritional Disturbance, Major Complexity                            |
| Gastroenterology        | K61B | Severe Nutritional Disturbance, Minor Complexity                            |
| Diagnostic GI Endoscopy | G46A | Complex Endoscopy, Major Complexity                                         |
| Diagnostic GI Endoscopy | G46B | Complex Endoscopy, Minor Complexity                                         |
| Diagnostic GI Endoscopy | G46C | Complex Endoscopy, Sameday                                                  |
| Diagnostic GI Endoscopy | G47A | Gastroscopy, Major Complexity                                               |
| Diagnostic GI Endoscopy | G47B | Gastroscopy, Intermediate Complexity                                        |
| Diagnostic GI Endoscopy | G47C | Gastroscopy, Minor Complexity                                               |
| Diagnostic GI Endoscopy | G48A | Colonoscopy, Major Complexity                                               |
| Diagnostic GI Endoscopy | G48B | Colonoscopy, Minor Complexity                                               |
| Diagnostic GI Endoscopy | G48C | Colonoscopy, Sameday                                                        |
| Diagnostic GI Endoscopy | H43A | ERCP Procedures, Major Complexity                                           |
| Diagnostic GI Endoscopy | H43B | ERCP Procedures, Intermediate Complexity                                    |
| Diagnostic GI Endoscopy | H43C | ERCP Procedures, Minor Complexity                                           |
| Haematology             | B40Z | Plasmapheresis W Neurological Disease, Sameday                              |
| Haematology             | B62Z | Apheresis                                                                   |
| Haematology             | Q61A | Red Blood Cell Disorders, Major Complexity                                  |
| Haematology             | Q61B | Red Blood Cell Disorders, Intermediate Complexity                           |
| Haematology             | Q61C | Red Blood Cell Disorders, Minor Complexity                                  |
| Haematology             | Q62A | Coagulation Disorders, Major Complexity                                     |
| Haematology             | Q62B | Coagulation Disorders, Minor Complexity                                     |
| Haematology             | R01A | Lymphoma and Leukaemia W Major OR Procedures, Major Complexity              |
| Haematology             | R01B | Lymphoma and Leukaemia W Major OR Procedures, Minor Complexity              |
| Haematology             | R03A | Lymphoma and Leukaemia W Other OR Procedures, Major Complexity              |
| Haematology             | R03B | Lymphoma and Leukaemia W Other OR Procedures, Intermediate Complexity       |
| Haematology             | R03C | Lymphoma and Leukaemia W Other OR Procedures, Minor Complexity              |
| Haematology             | R60A | Acute Leukaemia, Major Complexity                                           |
| Haematology             | R60B | Acute Leukaemia, Minor Complexity                                           |
| Haematology             | R60C | Acute Leukaemia, Sameday                                                    |
| Haematology             | R61A | Lymphoma and Non-Acute Leukaemia, Major Complexity                          |
| Haematology             | R61B | Lymphoma and Non-Acute Leukaemia, Minor Complexity                          |
| Haematology             | R61C | Lymphoma and Non-Acute Leukaemia, Sameday                                   |
| Haematology             | J64A | Cellulitis, Major Complexity                                                |
| Immunology & Infections | J64B | Cellulitis, Minor Complexity                                                |
| Immunology & Infections | Q60A | Reticuloendothelial and Immunity Disorders, Major Complexity                |
| Immunology & Infections | Q60B | Reticuloendothelial and Immunity Disorders, Minor Complexity                |
| Immunology & Infections | Q60C | Reticuloendothelial and Immunity Disorders, Sameday                         |
| Immunology & Infections | S65A | Human Immunodeficiency Virus, Major Complexity                              |
| Immunology & Infections | S65B | Human Immunodeficiency Virus, Intermediate Complexity                       |
| Immunology & Infections | S65C | Human Immunodeficiency Virus, Minor Complexity                              |
| Immunology & Infections | S65D | Human Immunodeficiency Virus, Sameday                                       |
| Immunology & Infections | T40Z | Infectious and Parasitic Diseases W Ventilator Support                      |
| Immunology & Infections | T60A | Septicaemia, Major Complexity                                               |
| Immunology & Infections | T60B | Septicaemia, Intermediate Complexity                                        |

|                         |      |                                                                             |
|-------------------------|------|-----------------------------------------------------------------------------|
| Immunology & Infections | T60C | Septicaemia, Minor Complexity                                               |
| Immunology & Infections | T62A | Fever of Unknown Origin, Major Complexity                                   |
| Immunology & Infections | T62B | Fever of Unknown Origin, Minor Complexity                                   |
| Immunology & Infections | T64A | Other Infectious and Parasitic Diseases, Major Complexity                   |
| Immunology & Infections | T64B | Other Infectious and Parasitic Diseases, Intermediate Complexity            |
| Immunology & Infections | T64C | Other Infectious and Parasitic Diseases, Minor Complexity                   |
| Oncology                | B66A | Nervous System Neoplasms, Major Complexity                                  |
| Oncology                | B66B | Nervous System Neoplasms, Minor Complexity                                  |
| Oncology                | B66C | Nervous System Neoplasms W/O Radiotherapy W/O Catastrophic or Severe CC     |
| Oncology                | D02B | Head and Neck Procedures, Intermediate Complexity                           |
| Oncology                | D60A | Ear, Nose, Mouth and Throat Malignancy, Major Complexity                    |
| Oncology                | D60B | Ear, Nose, Mouth and Throat Malignancy, Minor Complexity                    |
| Oncology                | D60C | Ear, Nose, Mouth and Throat Malignancy, Sameday                             |
| Oncology                | E71A | Respiratory Neoplasms, Major Complexity                                     |
| Oncology                | E71B | Respiratory Neoplasms, Minor Complexity                                     |
| Oncology                | E71C | Respiratory Neoplasms, Sameday                                              |
| Oncology                | G03A | Stomach, Oesophageal and Duodenal Procedures, Major Complexity              |
| Oncology                | G07A | Appendicectomy, Major Complexity                                            |
| Oncology                | G60A | Digestive Malignancy, Major Complexity                                      |
| Oncology                | G60B | Digestive Malignancy, Minor Complexity                                      |
| Oncology                | H61A | Malignancy of Hepatobiliary System and Pancreas, Major Complexity           |
| Oncology                | H61B | Malignancy of Hepatobiliary System and Pancreas, Minor Complexity           |
| Oncology                | H61C | Malignancy of Hepatobiliary System and Pancreas, Sameday                    |
| Oncology                | I65A | Musculoskeletal Malignant Neoplasms, Major Complexity                       |
| Oncology                | I65B | Musculoskeletal Malignant Neoplasms, Minor Complexity                       |
| Oncology                | J62A | Malignant Breast Disorders, Major Complexity                                |
| Oncology                | J62B | Malignant Breast Disorders, Minor Complexity                                |
| Oncology                | J69A | Skin Malignancy, Major Complexity                                           |
| Oncology                | J69B | Skin Malignancy, Intermediate Complexity                                    |
| Oncology                | J69C | Skin Malignancy, Minor Complexity                                           |
| Oncology                | L03A | Kidney, Ureter and Major Bladder Procedures for Neoplasm, Major Complexity  |
| Oncology                | L03B | Kidney, Ureter and Major Bladder Procedures for Neoplasm, Intermediate Comp |
| Oncology                | L03C | Kidney, Ureter and Major Bladder Procedures for Neoplasm, Minor Complexity  |
| Oncology                | L62A | Kidney and Urinary Tract Neoplasms, Major Complexity                        |
| Oncology                | L62B | Kidney and Urinary Tract Neoplasms, Minor Complexity                        |
| Oncology                | M60A | Male Reproductive System Malignancy, Major Complexity                       |
| Oncology                | M60B | Male Reproductive System Malignancy, Minor Complexity                       |
| Oncology                | N12A | Uterus and Adnexa Procedures for Malignancy, Major Complexity               |
| Oncology                | N12B | Uterus and Adnexa Procedures for Malignancy, Intermediate Complexity        |
| Oncology                | N12C | Uterus and Adnexa Procedures for Malignancy, Minor Complexity               |
| Oncology                | N60A | Female Reproductive System Malignancy, Major Complexity                     |
| Oncology                | N60B | Female Reproductive System Malignancy, Minor Complexity                     |
| Oncology                | R02A | Other Neoplastic Disorders W Major OR Procedures, Major Complexity          |
| Oncology                | R02B | Other Neoplastic Disorders W Major OR Procedures, Intermediate Complexity   |
| Oncology                | R02C | Other Neoplastic Disorders W Major OR Procedures, Minor Complexity          |
| Oncology                | R04A | Other Neoplastic Disorders W Other OR Procedures, Major Complexity          |
| Oncology                | R04B | Other Neoplastic Disorders W Other OR Procedures, Minor Complexity          |

|                             |      |                                                                              |
|-----------------------------|------|------------------------------------------------------------------------------|
| Oncology                    | R62A | Other Neoplastic Disorders, Major Complexity                                 |
| Oncology                    | R62B | Other Neoplastic Disorders, Intermediate Complexity                          |
| Oncology                    | R62C | Other Neoplastic Disorders, Minor Complexity                                 |
| Chemotherapy & Radiotherapy | R63Z | Chemotherapy                                                                 |
| Chemotherapy & Radiotherapy | R64Z | Radiotherapy                                                                 |
| Neurology                   | B41Z | Telemetric EEG Monitoring                                                    |
| Neurology                   | B42A | Nervous System Disorders W Ventilator Support, Major Complexity              |
| Neurology                   | B42B | Nervous System Disorders W Ventilator Support, Minor Complexity              |
| Neurology                   | B60A | Acute Paraplegia and Quadriplegia W or W/O OR Procedures, Major Complexity   |
| Neurology                   | B60B | Acute Paraplegia and Quadriplegia W or W/O OR Procedures, Minor Complexity   |
| Neurology                   | B65A | Cerebral Palsy, Major Complexity                                             |
| Neurology                   | B65B | Cerebral Palsy, Minor Complexity                                             |
| Neurology                   | B67A | Degenerative Nervous System Disorders, Major Complexity                      |
| Neurology                   | B67B | Degenerative Nervous System Disorders, Intermediate Complexity               |
| Neurology                   | B67C | Degenerative Nervous System Disorders, Minor Complexity                      |
| Neurology                   | B68A | Multiple Sclerosis and Cerebellar Ataxia, Major Complexity                   |
| Neurology                   | B68B | Multiple Sclerosis and Cerebellar Ataxia, Minor Complexity                   |
| Neurology                   | B69A | TIA and Precerebral Occlusion, Major Complexity                              |
| Neurology                   | B69B | TIA and Precerebral Occlusion, Minor Complexity                              |
| Neurology                   | B70A | Stroke and Other Cerebrovascular Disorders, Major Complexity                 |
| Neurology                   | B70B | Stroke and Other Cerebrovascular Disorders, Intermediate Complexity          |
| Neurology                   | B70C | Stroke and Other Cerebrovascular Disorders, Minor Complexity                 |
| Neurology                   | B70D | Stroke and Other Cerebrovascular Disorders, Transferred <5 Days              |
| Neurology                   | B71A | Cranial and Peripheral Nerve Disorders, Major Complexity                     |
| Neurology                   | B71B | Cranial and Peripheral Nerve Disorders, Minor Complexity                     |
| Neurology                   | B71C | Cranial and Peripheral Nerve Disorders, Sameday                              |
| Neurology                   | B72A | Nervous System Infection Except Viral Meningitis, Major Complexity           |
| Neurology                   | B72B | Nervous System Infection Except Viral Meningitis, Minor Complexity           |
| Neurology                   | B73Z | Viral Meningitis                                                             |
| Neurology                   | B76A | Seizures, Major Complexity                                                   |
| Neurology                   | B76B | Seizures, Minor Complexity                                                   |
| Neurology                   | B76C | Seizures, Sameday                                                            |
| Neurology                   | B77A | Headaches, Major Complexity                                                  |
| Neurology                   | B77B | Headaches, Minor Complexity                                                  |
| Neurology                   | B77Z | Headache                                                                     |
| Neurology                   | B81A | Other Disorders of the Nervous System, Major Complexity                      |
| Neurology                   | B81B | Other Disorders of the Nervous System, Minor Complexity                      |
| Neurology                   | B82A | Chronic & Unspec Para/Quadriplegia W or W/O OR Proc, Major Complexity        |
| Neurology                   | B82B | Chronic & Unspec Para/Quadriplegia W or W/O OR Proc, Intermediate Complexity |
| Neurology                   | B82C | Chronic & Unspec Para/Quadriplegia W or W/O OR Proc, Minor Complexity        |
| Neurology                   | C61A | Neurological and Vascular Disorders of the Eye, Major Complexity             |
| Neurology                   | C61B | Neurological and Vascular Disorders of the Eye, Minor Complexity             |
| Neurology                   | D61A | Dysequilibrium, Major Complexity                                             |
| Neurology                   | D61B | Dysequilibrium, Minor Complexity                                             |
| Neurology                   | D61C | Dysequilibrium, Sameday                                                      |
| Renal Medicine              | L02A | Operative Insertion of Peritoneal Catheter for Dialysis, Major Complexity    |

|                      |      |                                                                                  |
|----------------------|------|----------------------------------------------------------------------------------|
| Renal Medicine       | L02B | Operative Insertion of Peritoneal Catheter for Dialysis, Minor Complexity        |
| Renal Medicine       | L09A | Other Procedures for Kidney and Urinary Tract Disorders, Major Complexity        |
| Renal Medicine       | L09B | Other Procedures for Kidney and Urinary Tract Disorders, Intermediate Complexity |
| Renal Medicine       | L09C | Other Procedures for Kidney and Urinary Tract Disorders, Minor Complexity        |
| Renal Medicine       | L60A | Kidney Failure, Major Complexity                                                 |
| Renal Medicine       | L60B | Kidney Failure, Intermediate Complexity                                          |
| Renal Medicine       | L60C | Kidney Failure, Minor Complexity                                                 |
| Renal Medicine       | L67A | Other Kidney and Urinary Tract Disorders, Major Complexity                       |
| Renal Medicine       | L67B | Other Kidney and Urinary Tract Disorders, Intermediate Complexity                |
| Renal Medicine       | L67C | Other Kidney and Urinary Tract Disorders, Minor Complexity                       |
| Respiratory Medicine | A40A | ECMO, Major Complexity                                                           |
| Respiratory Medicine | A40B | ECMO, Minor Complexity                                                           |
| Respiratory Medicine | D66C | Other Ear, Nose, Mouth and Throat Disorders, Sameday                             |
| Respiratory Medicine | E02A | Other Respiratory System OR Procedures, Major Complexity                         |
| Respiratory Medicine | E02B | Other Respiratory System OR Procedures, Intermediate Complexity                  |
| Respiratory Medicine | E02C | Other Respiratory System OR Procedures, Minor Complexity                         |
| Respiratory Medicine | E40A | Respiratory System Disorders W Ventilator Support, Major Complexity              |
| Respiratory Medicine | E40B | Respiratory System Disorders W Ventilator Support, Minor Complexity              |
| Respiratory Medicine | E41A | Respiratory System Disorders W Non-Invasive Ventilation, Major Complexity        |
| Respiratory Medicine | E41B | Respiratory System Disorders W Non-Invasive Ventilation, Minor Complexity        |
| Respiratory Medicine | E42A | Bronchoscopy, Major Complexity                                                   |
| Respiratory Medicine | E42B | Bronchoscopy, Minor Complexity                                                   |
| Respiratory Medicine | E42C | Bronchoscopy, Sameday                                                            |
| Respiratory Medicine | E60A | Cystic Fibrosis, Major Complexity                                                |
| Respiratory Medicine | E60B | Cystic Fibrosis, Minor Complexity                                                |
| Respiratory Medicine | E61A | Pulmonary Embolism, Major Complexity                                             |
| Respiratory Medicine | E61B | Pulmonary Embolism, Minor Complexity                                             |
| Respiratory Medicine | E62A | Respiratory Infections and Inflammations, Major Complexity                       |
| Respiratory Medicine | E62B | Respiratory Infections and Inflammations, Minor Complexity                       |
| Respiratory Medicine | E62C | Respiratory Infections/Inflammations W/O CC                                      |
| Respiratory Medicine | E63A | Sleep Apnoea, Major Complexity                                                   |
| Respiratory Medicine | E63B | Sleep Apnoea, Minor Complexity                                                   |
| Respiratory Medicine | E63Z | Sleep Apnoea                                                                     |
| Respiratory Medicine | E64A | Pulmonary Oedema and Respiratory Failure, Major Complexity                       |
| Respiratory Medicine | E64B | Pulmonary Oedema and Respiratory Failure, Minor Complexity                       |
| Respiratory Medicine | E65A | Chronic Obstructive Airways Disease, Major Complexity                            |
| Respiratory Medicine | E65B | Chronic Obstructive Airways Disease, Minor Complexity                            |
| Respiratory Medicine | E67A | Respiratory Signs and Symptoms, Major Complexity                                 |
| Respiratory Medicine | E67B | Respiratory Signs and Symptoms, Minor Complexity                                 |
| Respiratory Medicine | E68A | Pneumothorax, Major Complexity                                                   |
| Respiratory Medicine | E68B | Pneumothorax, Minor Complexity                                                   |
| Respiratory Medicine | E69A | Bronchitis and Asthma, Major Complexity                                          |
| Respiratory Medicine | E69B | Bronchitis and Asthma, Minor Complexity                                          |
| Respiratory Medicine | E72Z | Respiratory Problems Arising from Neonatal Period                                |
| Respiratory Medicine | E73A | Pleural Effusion, Major Complexity                                               |
| Respiratory Medicine | E73B | Pleural Effusion, Intermediate Complexity                                        |
| Respiratory Medicine | E73C | Pleural Effusion, Minor Complexity                                               |

|                           |      |                                                                                |
|---------------------------|------|--------------------------------------------------------------------------------|
| Respiratory Medicine      | E74A | Interstitial Lung Disease, Major Complexity                                    |
| Respiratory Medicine      | E74B | Interstitial Lung Disease, Minor Complexity                                    |
| Respiratory Medicine      | E74C | Interstitial Lung Disease W/O CC                                               |
| Respiratory Medicine      | E75A | Other Respiratory System Disorders, Major Complexity                           |
| Respiratory Medicine      | E75B | Other Respiratory System Disorders, Minor Complexity                           |
| Respiratory Medicine      | E76A | Respiratory Tuberculosis, Major Complexity                                     |
| Respiratory Medicine      | E76B | Respiratory Tuberculosis, Minor Complexity                                     |
| Rheumatology              | I66A | Inflammatory Musculoskeletal Disorders, Major Complexity                       |
| Rheumatology              | I66B | Inflammatory Musculoskeletal Disorders, Intermediate Complexity                |
| Rheumatology              | I66C | Inflammatory Musculoskeletal Disorders, Minor Complexity                       |
| Rheumatology              | I71A | Other Musculotendinous Disorders, Major Complexity                             |
| Rheumatology              | I71B | Other Musculotendinous Disorders, Minor Complexity                             |
| Rheumatology              | I72A | Specific Musculotendinous Disorders, Major Complexity                          |
| Rheumatology              | I72B | Specific Musculotendinous Disorders, Minor Complexity                          |
| Non Subspecialty Medicine | B63A | Dementia and Other Chronic Disturbances of Cerebral Function, Major Complexity |
| Non Subspecialty Medicine | B63B | Dementia and Other Chronic Disturbances of Cerebral Function, Minor Complexity |
| Non Subspecialty Medicine | B63Z | Dementia and Other Chronic Disturbances of Cerebral Function                   |
| Non Subspecialty Medicine | B64A | Delirium, Major Complexity                                                     |
| Non Subspecialty Medicine | B64B | Delirium, Minor Complexity                                                     |
| Non Subspecialty Medicine | B74A | Nontraumatic Stupor and Coma, Major Complexity                                 |
| Non Subspecialty Medicine | B74B | Nontraumatic Stupor and Coma, Minor Complexity                                 |
| Non Subspecialty Medicine | B75Z | Febrile Convulsions                                                            |
| Non Subspecialty Medicine | D63C | Otitis Media and Upper Respiratory Infections, Sameday                         |
| Non Subspecialty Medicine | D64A | Laryngotracheitis and Epiglottitis, Major Complexity                           |
| Non Subspecialty Medicine | D64B | Laryngotracheitis and Epiglottitis, Minor Complexity                           |
| Non Subspecialty Medicine | D64Z | Laryngotracheitis and Epiglottitis                                             |
| Non Subspecialty Medicine | D65A | Nasal Trauma and Deformity, Major Complexity                                   |
| Non Subspecialty Medicine | D65B | Nasal Trauma and Deformity, Minor Complexity                                   |
| Non Subspecialty Medicine | D65Z | Nasal Trauma and Deformity                                                     |
| Non Subspecialty Medicine | E70A | Whooping Cough and Acute Bronchiolitis, Major Complexity                       |
| Non Subspecialty Medicine | E70B | Whooping Cough and Acute Bronchiolitis, Minor Complexity                       |
| Non Subspecialty Medicine | F73A | Syncope and Collapse, Major Complexity                                         |
| Non Subspecialty Medicine | F73B | Syncope and Collapse, Minor Complexity                                         |
| Non Subspecialty Medicine | F73C | Syncope and Collapse, Sameday                                                  |
| Non Subspecialty Medicine | I40Z | Infusions for Musculoskeletal Disorders, Sameday                               |
| Non Subspecialty Medicine | L63A | Kidney and Urinary Tract Infections, Major Complexity                          |
| Non Subspecialty Medicine | L63B | Kidney and Urinary Tract Infections, Minor Complexity                          |
| Non Subspecialty Medicine | T63A | Viral Illnesses, Major Complexity                                              |
| Non Subspecialty Medicine | T63B | Viral Illnesses, Minor Complexity                                              |
| Non Subspecialty Medicine | X61A | Allergic Reactions, Major Complexity                                           |
| Non Subspecialty Medicine | X61B | Allergic Reactions, Minor Complexity                                           |
| Non Subspecialty Medicine | X61Z | Allergic Reactions                                                             |
| Non Subspecialty Medicine | X64A | Other Injuries, Poisonings and Toxic Effects, Major Complexity                 |
| Non Subspecialty Medicine | X64B | Other Injuries, Poisonings and Toxic Effects, Minor Complexity                 |
| Non Subspecialty Medicine | Z40Z | Other Contacts W Health Services W Endoscopy, Sameday                          |
| Non Subspecialty Medicine | Z61A | Signs and Symptoms, Major Complexity                                           |
| Non Subspecialty Medicine | Z61B | Signs and Symptoms, Intermediate Complexity                                    |
| Non Subspecialty Medicine | Z61C | Signs and Symptoms, Minor Complexity                                           |
| Non Subspecialty Medicine | Z63A | Other Follow Up After Surgery or Medical Care, Major Complexity                |
| Non Subspecialty Medicine | Z63B | Other Follow Up After Surgery or Medical Care, Minor Complexity                |



|                           |      |                                                                                  |
|---------------------------|------|----------------------------------------------------------------------------------|
| Non Subspecialty Medicine | Z64A | Other Factors Influencing Health Status, Major Complexity                        |
| Non Subspecialty Medicine | Z64B | Other Factors Influencing Health Status, Minor Complexity                        |
| Non Subspecialty Medicine | Z65Z | Congenital Anomalies and Problems Arising from Neonatal Period                   |
| Non Subspecialty Medicine | Z66Z | Sleep Disorders                                                                  |
| Breast Surgery            | J06A | Major Procedures for Breast Disorders, Major Complexity                          |
| Breast Surgery            | J06B | Major Procedures for Breast Disorders, Minor Complexity                          |
| Breast Surgery            | J07A | Minor Procedures for Breast Disorders, Major Complexity                          |
| Breast Surgery            | J07B | Minor Procedures for Breast Disorders, Minor Complexity                          |
| Breast Surgery            | J14Z | Major Breast Reconstructions                                                     |
| Breast Surgery            | J63A | Non-Malignant Breast Disorders, Major Complexity                                 |
| Breast Surgery            | J63B | Non-Malignant Breast Disorders, Minor Complexity                                 |
| Cardiothoracic Surgery    | A10Z | Insertion of Ventricular Assist Device                                           |
| Cardiothoracic Surgery    | E01A | Major Chest Procedures, Major Complexity                                         |
| Cardiothoracic Surgery    | E01B | Major Chest Procedures, Intermediate Complexity                                  |
| Cardiothoracic Surgery    | E01C | Major Chest Procedures, Minor Complexity                                         |
| Cardiothoracic Surgery    | F03A | Cardiac Valve Procedures W CPB Pump W Invasive Cardiac Investigation, Major Comp |
| Cardiothoracic Surgery    | F03B | Cardiac Valve Procedures W CPB Pump W Invasive Cardiac Investigation, Minor Comp |
| Cardiothoracic Surgery    | F04A | Cardiac Valve Procedures W CPB Pump W/O Invasive Cardiac Invest, Major Comp      |
| Cardiothoracic Surgery    | F04B | Cardiac Valve Procedures W CPB Pump W/O Invasive Cardiac Invest, Interm Comp     |
| Cardiothoracic Surgery    | F04C | Cardiac Valve Procedures W CPB Pump W/O Invasive Cardiac Invest, Minor Comp      |
| Cardiothoracic Surgery    | F05A | Coronary Bypass W Invasive Cardiac Investigation, Major Complexity               |
| Cardiothoracic Surgery    | F05B | Coronary Bypass W Invasive Cardiac Investigation, Minor Complexity               |
| Cardiothoracic Surgery    | F06A | Coronary Bypass W/O Invasive Cardiac Investigation, Major Complexity             |
| Cardiothoracic Surgery    | F06B | Coronary Bypass W/O Invasive Cardiac Investigation, Minor Complexity             |
| Cardiothoracic Surgery    | F07A | Other Cardiothoracic/Vascular Procedures W CPB Pump, Major Complexity            |
| Cardiothoracic Surgery    | F07B | Other Cardiothoracic/Vascular Procedures W CPB Pump, Intermediate Complexity     |
| Cardiothoracic Surgery    | F07C | Other Cardiothoracic/Vascular Procedures W CPB Pump, Minor Complexity            |
| Cardiothoracic Surgery    | F09A | Other Cardiothoracic Procedures W/O CPB Pump, Major Complexity                   |
| Cardiothoracic Surgery    | F09B | Other Cardiothoracic Procedures W/O CPB Pump, Intermediate Complexity            |
| Cardiothoracic Surgery    | F09C | Other Cardiothoracic Procedures W/O CPB Pump, Minor Complexity                   |
| Cardiothoracic Surgery    | P02Z | Cardiothoracic and Vascular Procedures for Neonates                              |
| Colorectal Surgery        | G01A | Rectal Resection, Major Complexity                                               |
| Colorectal Surgery        | G01B | Rectal Resection, Intermediate Complexity                                        |
| Colorectal Surgery        | G01C | Rectal Resection, Minor Complexity                                               |
| Colorectal Surgery        | G02A | Major Small and Large Bowel Procedures, Major Complexity                         |
| Colorectal Surgery        | G02B | Major Small and Large Bowel Procedures, Intermediate Complexity                  |
| Colorectal Surgery        | G02C | Major Small and Large Bowel Procedures, Minor Complexity                         |
| Colorectal Surgery        | G05A | Minor Small and Large Bowel Procedures, Major Complexity                         |
| Colorectal Surgery        | G05B | Minor Small and Large Bowel Procedures, Minor Complexity                         |
| Colorectal Surgery        | G05C | Minor Small and Large Bowel Procedures W/O CC                                    |
| Colorectal Surgery        | G11A | Anal and Stomal Procedures, Major Complexity                                     |
| Colorectal Surgery        | G11B | Anal and Stomal Procedures, Minor Complexity                                     |
| Colorectal Surgery        | G11Z | Anal and Stomal Procedures                                                       |
| Colorectal Surgery        | J09Z | Perianal and Pilonidal Procedures                                                |

|                     |      |                                                                         |
|---------------------|------|-------------------------------------------------------------------------|
| Upper GIT Surgery   | G03B | Stomach, Oesophageal and Duodenal Procedures, Intermediate Complexity   |
| Upper GIT Surgery   | G03C | Stomach, Oesophageal and Duodenal Procedures, Minor Complexity          |
| Upper GIT Surgery   | G06Z | Pyloromyotomy                                                           |
| Upper GIT Surgery   | H01A | Pancreas, Liver and Shunt Procedures, Major Complexity                  |
| Upper GIT Surgery   | H01B | Pancreas, Liver and Shunt Procedures, Intermediate Complexity           |
| Upper GIT Surgery   | H01C | Pancreas, Liver and Shunt Procedures, Minor Complexity                  |
| Upper GIT Surgery   | H02A | Major Biliary Tract Procedures, Major Complexity                        |
| Upper GIT Surgery   | H02B | Major Biliary Tract Procedures, Minor Complexity                        |
| Upper GIT Surgery   | H05A | Hepatobiliary Diagnostic Procedures, Major Complexity                   |
| Upper GIT Surgery   | H05B | Hepatobiliary Diagnostic Procedures, Minor Complexity                   |
| Upper GIT Surgery   | H06A | Other Hepatobiliary and Pancreas OR Procedures, Major Complexity        |
| Upper GIT Surgery   | H06B | Other Hepatobiliary and Pancreas OR Procedures, Intermediate Complexity |
| Upper GIT Surgery   | H06C | Other Hepatobiliary and Pancreas OR Procedures, Minor Complexity        |
| Upper GIT Surgery   | H07A | Open Cholecystectomy, Major Complexity                                  |
| Upper GIT Surgery   | H07B | Open Cholecystectomy, Intermediate Complexity                           |
| Upper GIT Surgery   | H07C | Open Cholecystectomy, Minor Complexity                                  |
| Upper GIT Surgery   | H08A | Laparoscopic Cholecystectomy, Major Complexity                          |
| Upper GIT Surgery   | H08B | Laparoscopic Cholecystectomy, Minor Complexity                          |
| Upper GIT Surgery   | H62A | Disorders of Pancreas, Except Malignancy, Major Complexity              |
| Upper GIT Surgery   | H62B | Disorders of Pancreas, Except Malignancy, Minor Complexity              |
| Upper GIT Surgery   | H64A | Disorders of the Biliary Tract, Major Complexity                        |
| Upper GIT Surgery   | H64B | Disorders of the Biliary Tract, Minor Complexity                        |
| Upper GIT Surgery   | H64C | Disorders of the Biliary Tract, Sameday                                 |
| Upper GIT Surgery   | K10A | Revisional and Open Bariatric Procedures, Major Complexity              |
| Upper GIT Surgery   | K10B | Revisional and Open Bariatric Procedures, Minor Complexity              |
| Upper GIT Surgery   | K11A | Major Laparoscopic Bariatric Procedures, Major Complexity               |
| Upper GIT Surgery   | K11B | Major Laparoscopic Bariatric Procedures, Minor Complexity               |
| Upper GIT Surgery   | K12A | Other Bariatric Procedures, Major Complexity                            |
| Upper GIT Surgery   | K12B | Other Bariatric Procedures, Minor Complexity                            |
| Upper GIT Surgery   | K12Z | Other Bariatric Procedures                                              |
| Upper GIT Surgery   | Q01A | Splenectomy, Major Complexity                                           |
| Upper GIT Surgery   | Q01B | Splenectomy, Minor Complexity                                           |
| Upper GIT Surgery   | W03Z | Abdominal Procedures for Multiple Significant Trauma                    |
| Head & Neck Surgery | D02A | Head and Neck Procedures, Major Complexity                              |
| Head & Neck Surgery | D02C | Head and Neck Procedures, Minor Complexity                              |
| Head & Neck Surgery | D05Z | Parotid Gland Procedures                                                |
| Head & Neck Surgery | D14A | Mouth and Salivary Gland Procedures, Major Complexity                   |
| Head & Neck Surgery | D14B | Mouth and Salivary Gland Procedures, Minor Complexity                   |
| Head & Neck Surgery | K05A | Parathyroid Procedures, Major Complexity                                |
| Head & Neck Surgery | K05B | Parathyroid Procedures, Minor Complexity                                |
| Head & Neck Surgery | K06A | Thyroid Procedures, Major Complexity                                    |
| Head & Neck Surgery | K06B | Thyroid Procedures, Minor Complexity                                    |
| Head & Neck Surgery | K08Z | Thyroglossal Procedures                                                 |
| Neurosurgery        | A12Z | Insertion of Neurostimulator Device                                     |
| Neurosurgery        | B01A | Ventricular Shunt Revision, Major Complexity                            |
| Neurosurgery        | B01B | Ventricular Shunt Revision, Minor Complexity                            |
| Neurosurgery        | B02A | Cranial Procedures, Major Complexity                                    |
| Neurosurgery        | B02B | Cranial Procedures, Intermediate Complexity                             |
| Neurosurgery        | B02C | Cranial Procedures, Minor Complexity                                    |
| Neurosurgery        | B02Y | Endovascular clot retrieval                                             |

|                    |      |                                                                                |
|--------------------|------|--------------------------------------------------------------------------------|
| Neurosurgery       | B03A | Spinal Procedures, Major Complexity                                            |
| Neurosurgery       | B03B | Spinal Procedures, Intermediate Complexity                                     |
| Neurosurgery       | B03C | Spinal Procedures, Minor Complexity                                            |
| Neurosurgery       | B06A | Procedures for Cerebral Palsy, Muscular Dystrophy and Neuropathy, Major Comp   |
| Neurosurgery       | B06B | Procedures for Cerebral Palsy, Muscular Dystrophy and Neuropathy, Interm Comp  |
| Neurosurgery       | B06C | Procedures for Cerebral Palsy, Muscular Dystrophy and Neuropathy, Minor Comp   |
| Neurosurgery       | B61A | Spinal Cord Conditions W or W/O OR Procedures, Major Complexity                |
| Neurosurgery       | B61B | Spinal Cord Conditions W or W/O OR Procedures, Minor Complexity                |
| Neurosurgery       | B78A | Intracranial Injuries, Major Complexity                                        |
| Neurosurgery       | B78B | Intracranial Injuries, Minor Complexity                                        |
| Neurosurgery       | B78C | Intracranial Injuries, Transferred <5 Days                                     |
| Neurosurgery       | B79A | Skull Fractures, Major Complexity                                              |
| Neurosurgery       | B79B | Skull Fractures, Minor Complexity                                              |
| Neurosurgery       | B80A | Other Head Injuries, Major Complexity                                          |
| Neurosurgery       | B80B | Other Head Injuries, Minor Complexity                                          |
| Neurosurgery       | I09A | Spinal Fusion, Major Complexity                                                |
| Neurosurgery       | I09B | Spinal Fusion, Intermediate Complexity                                         |
| Neurosurgery       | I09C | Spinal Fusion, Minor Complexity                                                |
| Neurosurgery       | I10A | Other Back and Neck Procedures, Major Complexity                               |
| Neurosurgery       | I10B | Other Back and Neck Procedures, Minor Complexity                               |
| Neurosurgery       | I15A | Cranio-Facial Surgery, Major Complexity                                        |
| Neurosurgery       | I15B | Cranio-Facial Surgery, Minor Complexity                                        |
| Neurosurgery       | I15Z | Cranio-Facial Surgery                                                          |
| Neurosurgery       | K02A | Pituitary Procedures, Major Complexity                                         |
| Neurosurgery       | K02B | Pituitary Procedures, Minor Complexity                                         |
| Neurosurgery       | W01A | Vent, Trac & Cran Procs for Mult Sig Trauma, Major Complexity                  |
| Neurosurgery       | W01B | Vent, Trac & Cran Procs for Mult Sig Trauma, Intermediate Complexity           |
| Neurosurgery       | W01C | Vent, Trac & Cran Procs for Mult Sig Trauma, Minor Complexity                  |
| Neurosurgery       | W60A | Multiple Sig Trauma, Died or Transferred to Acute Facility <5 Days, Major Comp |
| Neurosurgery       | W60B | Multiple Sig Trauma, Died or Transferred to Acute Facility <5 Days, Minor Comp |
| Dentistry          | D40Z | Dental Extractions and Restorations                                            |
| Ear, Nose & Throat | D01Z | Cochlear Implant                                                               |
| Ear, Nose & Throat | D06Z | Sinus and Complex Middle Ear Procedures                                        |
| Ear, Nose & Throat | D10Z | Nasal Procedures                                                               |
| Ear, Nose & Throat | D11Z | Tonsillectomy and Adenoidectomy                                                |
| Ear, Nose & Throat | D12A | Other Ear, Nose, Mouth and Throat Procedures, Major Complexity                 |
| Ear, Nose & Throat | D12B | Other Ear, Nose, Mouth and Throat Procedures, Minor Complexity                 |
| Ear, Nose & Throat | D13Z | Myringotomy W Tube Insertion                                                   |
| Ear, Nose & Throat | D15Z | Mastoid Procedures                                                             |
| Ear, Nose & Throat | D62A | Epistaxis, Major Complexity                                                    |
| Ear, Nose & Throat | D62B | Epistaxis, Minor Complexity                                                    |
| Ear, Nose & Throat | D63A | Otitis Media and Upper Respiratory Infections, Major Complexity                |
| Ear, Nose & Throat | D63B | Otitis Media and Upper Respiratory Infections, Minor Complexity                |
| Ear, Nose & Throat | D66A | Other Ear, Nose, Mouth and Throat Disorders, Major Complexity                  |
| Ear, Nose & Throat | D66B | Other Ear, Nose, Mouth and Throat Disorders, Minor Complexity                  |
| Orthopaedics       | A11A | Insertion of Implantable Spinal Infusion Device, Major Complexity              |
| Orthopaedics       | A11B | Insertion of Implantable Spinal Infusion Device, Minor Complexity              |

|              |      |                                                                                  |
|--------------|------|----------------------------------------------------------------------------------|
| Orthopaedics | B05Z | Carpal Tunnel Release                                                            |
| Orthopaedics | I01A | Bilateral and Multiple Major Joint Procedures of Lower Limb, Major Complexity    |
| Orthopaedics | I01B | Bilateral and Multiple Major Joint Procedures of Lower Limb, Minor Complexity    |
| Orthopaedics | I03A | Hip Replacement, Major Complexity                                                |
| Orthopaedics | I03B | Hip Replacement, Minor Complexity                                                |
| Orthopaedics | I04A | Knee Replacement, Major Complexity                                               |
| Orthopaedics | I04B | Knee Replacement, Minor Complexity                                               |
| Orthopaedics | I05A | Other Joint Replacement, Major Complexity                                        |
| Orthopaedics | I05B | Other Joint Replacement, Minor Complexity                                        |
| Orthopaedics | I06Z | Spinal Fusion for Deformity                                                      |
| Orthopaedics | I07Z | Amputation                                                                       |
| Orthopaedics | I08A | Other Hip and Femur Procedures, Major Complexity                                 |
| Orthopaedics | I08B | Other Hip and Femur Procedures, Minor Complexity                                 |
| Orthopaedics | I11Z | Limb Lengthening Procedures                                                      |
| Orthopaedics | I12A | Misc Musculoskeletal Procs for Infect/Inflam of Bone/Joint, Major Complexity     |
| Orthopaedics | I12B | Misc Musculoskeletal Procs for Infect/Inflam of Bone/Joint, Intermediate Comp    |
| Orthopaedics | I12C | Misc Musculoskeletal Procs for Infect/Inflam of Bone/Joint, Minor Complexity     |
| Orthopaedics | I13A | Humerus, Tibia, Fibula and Ankle Procedures, Major Complexity                    |
| Orthopaedics | I13B | Humerus, Tibia, Fibula and Ankle Procedures, Minor Complexity                    |
| Orthopaedics | I16Z | Other Shoulder Procedures                                                        |
| Orthopaedics | I18A | Other Knee Procedures, Major Complexity                                          |
| Orthopaedics | I18B | Other Knee Procedures, Minor Complexity                                          |
| Orthopaedics | I18Z | Other Knee Procedures                                                            |
| Orthopaedics | I19A | Other Elbow and Forearm Procedures, Major Complexity                             |
| Orthopaedics | I19B | Other Elbow and Forearm Procedures, Minor Complexity                             |
| Orthopaedics | I20A | Other Foot Procedures, Major Complexity                                          |
| Orthopaedics | I20B | Other Foot Procedures, Minor Complexity                                          |
| Orthopaedics | I20Z | Other Foot Procedures                                                            |
| Orthopaedics | I21Z | Local Excision and Removal of Internal Fixation Devices of Hip and Femur         |
| Orthopaedics | I23A | Local Excision & Removal of Internal Fixation Device, Except Hip & Fmr, Maj Comp |
| Orthopaedics | I23B | Local Excision & Removal of Internal Fixation Device, Except Hip & Fmr, Min Comp |
| Orthopaedics | I23Z | Local Excision and Removal of Internal Fixation Devices, Except Hip and Femur    |
| Orthopaedics | I24A | Arthroscopy, Major Complexity                                                    |
| Orthopaedics | I24B | Arthroscopy, Minor Complexity                                                    |
| Orthopaedics | I24Z | Arthroscopy                                                                      |
| Orthopaedics | I25A | Bone and Joint Diagnostic Procedures Including Biopsy, Major Complexity          |
| Orthopaedics | I25B | Bone and Joint Diagnostic Procedures Including Biopsy, Minor Complexity          |
| Orthopaedics | I27A | Soft Tissue Procedures, Major Complexity                                         |
| Orthopaedics | I27B | Soft Tissue Procedures, Minor Complexity                                         |
| Orthopaedics | I28A | Other Musculoskeletal Procedures, Major Complexity                               |
| Orthopaedics | I28B | Other Musculoskeletal Procedures, Intermediate Complexity                        |
| Orthopaedics | I28C | Other Musculoskeletal Procedures, Minor Complexity                               |
| Orthopaedics | I29Z | Knee Reconstructions, and Revisions of Reconstructions                           |

|               |      |                                                                                |
|---------------|------|--------------------------------------------------------------------------------|
| Orthopaedics  | I30Z | Hand Procedures                                                                |
| Orthopaedics  | I31A | Revision of Hip Replacement, Major Complexity                                  |
| Orthopaedics  | I31B | Revision of Hip Replacement, Intermediate Complexity                           |
| Orthopaedics  | I31C | Revision of Hip Replacement, Minor Complexity                                  |
| Orthopaedics  | I32A | Revision of Knee Replacement, Major Complexity                                 |
| Orthopaedics  | I32B | Revision of Knee Replacement, Minor Complexity                                 |
| Orthopaedics  | I60Z | Femoral Shaft Fractures                                                        |
| Orthopaedics  | I61A | Distal Femoral Fractures, Major Complexity                                     |
| Orthopaedics  | I61B | Distal Femoral Fractures, Minor Complexity                                     |
| Orthopaedics  | I63A | Sprains, Strains and Dislocations of Hip, Pelvis and Thigh, Major Complexity   |
| Orthopaedics  | I63B | Sprains, Strains and Dislocations of Hip, Pelvis and Thigh, Minor Complexity   |
| Orthopaedics  | I64A | Osteomyelitis, Major Complexity                                                |
| Orthopaedics  | I64B | Osteomyelitis, Minor Complexity                                                |
| Orthopaedics  | I67A | Septic Arthritis, Major Complexity                                             |
| Orthopaedics  | I67B | Septic Arthritis, Minor Complexity                                             |
| Orthopaedics  | I68A | Non-surgical Spinal Disorders, Major Complexity                                |
| Orthopaedics  | I68B | Non-surgical Spinal Disorders, Minor Complexity                                |
| Orthopaedics  | I69A | Bone Diseases and Arthropathies, Major Complexity                              |
| Orthopaedics  | I69B | Bone Diseases and Arthropathies, Minor Complexity                              |
| Orthopaedics  | I73A | Aftercare of Musculoskeletal Implants or Prostheses, Major Complexity          |
| Orthopaedics  | I73B | Aftercare of Musculoskeletal Implants or Prostheses, Minor Complexity          |
| Orthopaedics  | I74A | Injuries to Forearm, Wrist, Hand and Foot, Major Complexity                    |
| Orthopaedics  | I74B | Injuries to Forearm, Wrist, Hand and Foot, Minor Complexity                    |
| Orthopaedics  | I75A | Injuries to Shoulder, Arm, Elbow, Knee, Leg and Ankle, Major Complexity        |
| Orthopaedics  | I75B | Injuries to Shoulder, Arm, Elbow, Knee, Leg and Ankle, Minor Complexity        |
| Orthopaedics  | I77A | Fractures of Pelvis, Major Complexity                                          |
| Orthopaedics  | I77B | Fractures of Pelvis, Minor Complexity                                          |
| Orthopaedics  | I78A | Fractures of Neck of Femur, Major Complexity                                   |
| Orthopaedics  | I78B | Fractures of Neck of Femur, Minor Complexity                                   |
| Orthopaedics  | I79A | Pathological Fractures, Major Complexity                                       |
| Orthopaedics  | I79B | Pathological Fractures, Minor Complexity                                       |
| Orthopaedics  | I80Z | Femoral Fractures, Transferred to Acute Facility <2 Days                       |
| Orthopaedics  | I81Z | Musculoskeletal Injuries, Sameday                                              |
| Orthopaedics  | I82Z | Other Sameday Treatment for Musculoskeletal Disorders                          |
| Orthopaedics  | W02A | Hip, Femur and Lower Limb Procedures for Multiple Sig Trauma, Major Complexity |
| Orthopaedics  | W02B | Hip, Femur and Lower Limb Procedures for Multiple Sig Trauma, Minor Complexity |
| Orthopaedics  | X05A | Other Procedures for Injuries to Hand, Major Complexity                        |
| Orthopaedics  | X05B | Other Procedures for Injuries to Hand, Minor Complexity                        |
| Ophthalmology | C01A | Procedures for Penetrating Eye Injury, Major Complexity                        |
| Ophthalmology | C01B | Procedures for Penetrating Eye Injury, Minor Complexity                        |
| Ophthalmology | C01Z | Procedures for Penetrating Eye Injury                                          |
| Ophthalmology | C02Z | Enucleations and Orbital Procedures                                            |
| Ophthalmology | C03A | Retinal Procedures, Major Complexity                                           |
| Ophthalmology | C03B | Retinal Procedures, Minor Complexity                                           |
| Ophthalmology | C03Z | Retinal Procedures                                                             |
| Ophthalmology | C04A | Major Corneal, Scleral and Conjunctival Procedures, Major Complexity           |
| Ophthalmology | C04B | Major Corneal, Scleral and Conjunctival Procedures, Minor Complexity           |

|                                  |      |                                                                                  |
|----------------------------------|------|----------------------------------------------------------------------------------|
| Ophthalmology                    | C04Z | Major Corneal, Scleral and Conjunctival Procedures                               |
| Ophthalmology                    | C05Z | Dacryocystorhinostomy                                                            |
| Ophthalmology                    | C10Z | Strabismus Procedures                                                            |
| Ophthalmology                    | C11Z | Eyelid Procedures                                                                |
| Ophthalmology                    | C12Z | Other Corneal, Scleral and Conjunctival Procedures                               |
| Ophthalmology                    | C13Z | Lacrimal Procedures                                                              |
| Ophthalmology                    | C14A | Other Eye Procedures, Major Complexity                                           |
| Ophthalmology                    | C14B | Other Eye Procedures, Minor Complexity                                           |
| Ophthalmology                    | C14Z | Other Eye Procedures                                                             |
| Ophthalmology                    | C15Z | Glaucoma and Complex Cataract Procedures                                         |
| Ophthalmology                    | C16Z | Lens Procedures                                                                  |
| Ophthalmology                    | C60A | Acute and Major Eye Infections, Major Complexity                                 |
| Ophthalmology                    | C60B | Acute and Major Eye Infections, Minor Complexity                                 |
| Ophthalmology                    | C62A | Hyphaema and Medically Managed Trauma to the Eye, Major Complexity               |
| Ophthalmology                    | C62B | Hyphaema and Medically Managed Trauma to the Eye, Minor Complexity               |
| Ophthalmology                    | C63A | Other Disorders of the Eye, Major Complexity                                     |
| Ophthalmology                    | C63B | Other Disorders of the Eye, Intermediate Complexity                              |
| Ophthalmology                    | C63C | Other Disorders of the Eye, Minor Complexity                                     |
| Plastic & Reconstructive Surgery | B07A | Cranial or Peripheral Nerve and Other Nervous System Procedures, Major Comp      |
| Plastic & Reconstructive Surgery | B07B | Cranial or Peripheral Nerve and Other Nervous System Procedures, Minor Comp      |
| Plastic & Reconstructive Surgery | D03Z | Surgical Repair for Cleft Lip and Palate Disorders                               |
| Plastic & Reconstructive Surgery | D04A | Maxillo Surgery, Major Complexity                                                |
| Plastic & Reconstructive Surgery | D04B | Maxillo Surgery, Minor Complexity                                                |
| Plastic & Reconstructive Surgery | D04Z | Maxillo Surgery                                                                  |
| Plastic & Reconstructive Surgery | D67A | Oral and Dental Disorders, Major Complexity                                      |
| Plastic & Reconstructive Surgery | D67B | Oral and Dental Disorders, Minor Complexity                                      |
| Plastic & Reconstructive Surgery | I02A | Microvascular Tissue Transfers or Skin Grafts, Excluding Hand, Major Complexity  |
| Plastic & Reconstructive Surgery | I02B | Microvascular Tissue Transfers or Skin Grafts, Excluding Hand, Intermediate Comp |
| Plastic & Reconstructive Surgery | I02C | Microvascular Tissue Transfers or Skin Grafts, Excluding Hand, Minor Complexity  |
| Plastic & Reconstructive Surgery | I17A | Maxillo-Facial Surgery, Major Complexity                                         |
| Plastic & Reconstructive Surgery | I17B | Maxillo-Facial Surgery, Minor Complexity                                         |
| Plastic & Reconstructive Surgery | I27C | Soft Tissue Procedures, Sameday                                                  |
| Plastic & Reconstructive Surgery | J01A | Microvas Tiss Transf for Skin, Subcut Tiss & Breast Dsrds, Major Complexity      |
| Plastic & Reconstructive Surgery | J01B | Microvas Tiss Transf for Skin, Subcut Tiss & Breast Dsrds, Minor Complexity      |
| Plastic & Reconstructive Surgery | J08A | Other Skin Grafts and Debridement Procedures, Major Complexity                   |
| Plastic & Reconstructive Surgery | J08B | Other Skin Grafts and Debridement Procedures, Intermediate Complexity            |

|                                  |      |                                                                                 |
|----------------------------------|------|---------------------------------------------------------------------------------|
| Plastic & Reconstructive Surgery | J08C | Other Skin Grafts and Debridement Procedures, Minor Complexity                  |
| Plastic & Reconstructive Surgery | J10A | Plastic OR Procs for Skin, Subcutaneous Tissue and Breast Disorders, Major Comp |
| Plastic & Reconstructive Surgery | J10B | Plastic OR Procs for Skin, Subcutaneous Tissue and Breast Disorders, Minor Comp |
| Plastic & Reconstructive Surgery | J10Z | Plastic OR Procedures for Skin, Subcutaneous Tissue and Breast Disorders        |
| Plastic & Reconstructive Surgery | J11A | Other Skin, Subcutaneous Tissue and Breast Procedures, Major Complexity         |
| Plastic & Reconstructive Surgery | J11B | Other Skin, Subcutaneous Tissue and Breast Procedures, Minor Complexity         |
| Plastic & Reconstructive Surgery | J11Z | Other Skin, Subcutaneous Tissue and Breast Procedures                           |
| Plastic & Reconstructive Surgery | J12A | Lower Limb Procedures W Ulcer or Cellulitis, Major Complexity                   |
| Plastic & Reconstructive Surgery | J12B | Lower Limb Procedures W Ulcer or Cellulitis, Minor Complexity                   |
| Plastic & Reconstructive Surgery | J12C | Lower Limb Procs W Ulcer/Cellulitis W/O Cat CC W/O Skin Graft/Flap Repair       |
| Plastic & Reconstructive Surgery | J13A | Lower Limb Procedures W/O Ulcer or Cellulitis, Major Complexity                 |
| Plastic & Reconstructive Surgery | J13B | Lower Limb Procedures W/O Ulcer or Cellulitis, Minor Complexity                 |
| Plastic & Reconstructive Surgery | J65C | Trauma to Skin, Subcutaneous Tissue and Breast, Sameday                         |
| Plastic & Reconstructive Surgery | K13Z | Plastic OR Procedures for Endocrine, Nutritional and Metabolic Disorders        |
| Plastic & Reconstructive Surgery | X02A | Microvascular Tissue Transfer and Skin Grafts for Injuries to Hand, Major Comp  |
| Plastic & Reconstructive Surgery | X02B | Microvascular Tissue Transfer and Skin Grafts for Injuries to Hand, Minor Comp  |
| Plastic & Reconstructive Surgery | X07A | Skin Grafts for Injuries Excluding Hand, Major Complexity                       |
| Plastic & Reconstructive Surgery | X07B | Skin Grafts for Injuries Excluding Hand, Intermediate Complexity                |
| Plastic & Reconstructive Surgery | X07C | Skin Grafts for Injuries Excluding Hand, Minor Complexity                       |
| Urology                          | K03Z | Adrenal Procedures                                                              |
| Urology                          | L04A | Kidney, Ureter and Major Bladder Procedures for Non-Neoplasm, Major Complexity  |
| Urology                          | L04B | Kidney, Ureter and Major Bladder Procedures for Non-Neoplasm, Intermediate Comp |
| Urology                          | L04C | Kidney, Ureter and Major Bladder Procedures for Non-Neoplasm, Minor Complexity  |
| Urology                          | L05A | Transurethral Prostatectomy for Urinary Disorder, Major Complexity              |
| Urology                          | L05B | Transurethral Prostatectomy for Urinary Disorder, Minor Complexity              |
| Urology                          | L06A | Minor Bladder Procedures, Major Complexity                                      |
| Urology                          | L06B | Minor Bladder Procedures, Intermediate Complexity                               |
| Urology                          | L06C | Minor Bladder Procedures, Minor Complexity                                      |
| Urology                          | L07A | Other Transurethral Procedures, Major Complexity                                |
| Urology                          | L07B | Other Transurethral Procedures, Minor Complexity                                |
| Urology                          | L08A | Urethral Procedures, Major Complexity                                           |
| Urology                          | L08B | Urethral Procedures, Minor Complexity                                           |
| Urology                          | L40Z | Ureteroscopy                                                                    |
| Urology                          | L41Z | Cystourethroscopy for Urinary Disorder, Sameday                                 |
| Urology                          | L42Z | ESW Lithotripsy                                                                 |

|                  |      |                                                                                  |
|------------------|------|----------------------------------------------------------------------------------|
| Urology          | L64A | Urinary Stones and Obstruction, Major Complexity                                 |
| Urology          | L64B | Urinary Stones and Obstruction, Minor Complexity                                 |
| Urology          | L64C | Urinary Stones and Obstruction, Sameday                                          |
| Urology          | L65A | Kidney and Urinary Tract Signs and Symptoms, Major Complexity                    |
| Urology          | L65B | Kidney and Urinary Tract Signs and Symptoms, Minor Complexity                    |
| Urology          | L66Z | Urethral Stricture                                                               |
| Urology          | M01A | Major Male Pelvic Procedures, Major Complexity                                   |
| Urology          | M01B | Major Male Pelvic Procedures, Minor Complexity                                   |
| Urology          | M02A | Transurethral Prostatectomy for Reproductive System Disorder, Major Complexity   |
| Urology          | M02B | Transurethral Prostatectomy for Reproductive System Disorder, Minor Complexity   |
| Urology          | M03A | Penis Procedures, Major Complexity                                               |
| Urology          | M03B | Penis Procedures, Minor Complexity                                               |
| Urology          | M03Z | Penis Procedures                                                                 |
| Urology          | M04Z | Testes Procedures                                                                |
| Urology          | M06A | Other Male Reproductive System OR Procedures, Major Complexity                   |
| Urology          | M06B | Other Male Reproductive System OR Procedures, Minor Complexity                   |
| Urology          | M40Z | Cystourethroscopy for Male Reproductive System Disorder, Sameday                 |
| Urology          | M61A | Benign Prostatic Hypertrophy, Major Complexity                                   |
| Urology          | M61B | Benign Prostatic Hypertrophy, Minor Complexity                                   |
| Urology          | M62A | Male Reproductive System Inflammation, Major Complexity                          |
| Urology          | M62B | Male Reproductive System Inflammation, Minor Complexity                          |
| Urology          | M63Z | Male Sterilisation Procedures                                                    |
| Urology          | M64A | Other Male Reproductive System Disorders, Major Complexity                       |
| Urology          | M64B | Other Male Reproductive System Disorders, Minor Complexity                       |
| Urology          | M64Z | Other Male Reproductive System Disorders                                         |
| Vascular Surgery | B04A | Extracranial Vascular Procedures, Major Complexity                               |
| Vascular Surgery | B04B | Extracranial Vascular Procedures, Intermediate Complexity                        |
| Vascular Surgery | B04C | Extracranial Vascular Procedures, Minor Complexity                               |
| Vascular Surgery | F08A | Major Reconstructive Vascular Procedures W/O CPB Pump, Major Complexity          |
| Vascular Surgery | F08B | Major Reconstructive Vascular Procedures W/O CPB Pump, Intermediate Complexity   |
| Vascular Surgery | F08C | Major Reconstructive Vascular Procedures W/O CPB Pump, Minor Complexity          |
| Vascular Surgery | F11A | Amputation, Except Upper Limb and Toe, for Circulatory Disorders, Major Comp     |
| Vascular Surgery | F11B | Amputation, Except Upper Limb and Toe, for Circulatory Disorders, Minor Comp     |
| Vascular Surgery | F13A | Amputation, Upper Limb and Toe, for Circulatory Disorders, Major Complexity      |
| Vascular Surgery | F13B | Amputation, Upper Limb and Toe, for Circulatory Disorders, Minor Complexity      |
| Vascular Surgery | F14A | Vascular Procedures, Except Major Reconstruction, W/O CPB Pump, Major Complexity |
| Vascular Surgery | F14B | Vascular Procedures, Except Major Reconstruction, W/O CPB Pump, Intern Comp      |
| Vascular Surgery | F14C | Vascular Procedures, Except Major Reconstruction, W/O CPB Pump, Minor Complexity |
| Vascular Surgery | F20Z | Vein Ligation and Stripping                                                      |
| Vascular Surgery | F21A | Other Circulatory System OR Procedures, Major Complexity                         |
| Vascular Surgery | F21B | Other Circulatory System OR Procedures, Intermediate Complexity                  |
| Vascular Surgery | F21C | Other Circulatory System OR Procedures, Minor Complexity                         |



|                          |      |                                                                            |
|--------------------------|------|----------------------------------------------------------------------------|
| Vascular Surgery         | F64A | Skin Ulcers in Circulatory Disorders, Major Complexity                     |
| Vascular Surgery         | F64B | Skin Ulcers in Circulatory Disorders, Intermediate Complexity              |
| Vascular Surgery         | F64C | Skin Ulcers in Circulatory Disorders, Minor Complexity                     |
| Vascular Surgery         | F65A | Peripheral Vascular Disorders, Major Complexity                            |
| Vascular Surgery         | F65B | Peripheral Vascular Disorders, Minor Complexity                            |
| Vascular Surgery         | J60A | Skin Ulcers, Major Complexity                                              |
| Vascular Surgery         | J60B | Skin Ulcers, Intermediate Complexity                                       |
| Vascular Surgery         | J60C | Skin Ulcers, Minor Complexity                                              |
| Vascular Surgery         | K01A | OR Procedures for Diabetic Complications, Major Complexity                 |
| Vascular Surgery         | K01B | OR Procedures for Diabetic Complications, Intermediate Complexity          |
| Vascular Surgery         | K01C | OR Procedures for Diabetic Complications, Minor Complexity                 |
| Non Subspecialty Surgery | E66A | Major Chest Trauma, Major Complexity                                       |
| Non Subspecialty Surgery | E66B | Major Chest Trauma, Minor Complexity                                       |
| Non Subspecialty Surgery | E66C | Major Chest Trauma W/O CC                                                  |
| Non Subspecialty Surgery | G04A | Peritoneal Adhesiolysis, Major Complexity                                  |
| Non Subspecialty Surgery | G04B | Peritoneal Adhesiolysis, Intermediate Complexity                           |
| Non Subspecialty Surgery | G04C | Peritoneal Adhesiolysis, Minor Complexity                                  |
| Non Subspecialty Surgery | G07B | Appendectomy, Minor Complexity                                             |
| Non Subspecialty Surgery | G10A | Hernia Procedures, Major Complexity                                        |
| Non Subspecialty Surgery | G10B | Hernia Procedures, Minor Complexity                                        |
| Non Subspecialty Surgery | G12A | Other Digestive System OR Procedures, Major Complexity                     |
| Non Subspecialty Surgery | G12B | Other Digestive System OR Procedures, Intermediate Complexity              |
| Non Subspecialty Surgery | G12C | Other Digestive System OR Procedures, Minor Complexity                     |
| Non Subspecialty Surgery | G65A | Gastrointestinal Obstruction, Major Complexity                             |
| Non Subspecialty Surgery | G65B | Gastrointestinal Obstruction, Minor Complexity                             |
| Non Subspecialty Surgery | G66A | Abdominal Pain and Mesenteric Adenitis, Major Complexity                   |
| Non Subspecialty Surgery | G66B | Abdominal Pain and Mesenteric Adenitis, Minor Complexity                   |
| Non Subspecialty Surgery | G70A | Other Digestive System Disorders, Major Complexity                         |
| Non Subspecialty Surgery | G70B | Other Digestive System Disorders, Minor Complexity                         |
| Non Subspecialty Surgery | G70C | Other Digestive System Disorders, Same-day                                 |
| Non Subspecialty Surgery | I76A | Other Musculoskeletal Disorders, Major Complexity                          |
| Non Subspecialty Surgery | I76B | Other Musculoskeletal Disorders, Intermediate Complexity                   |
| Non Subspecialty Surgery | I76C | Other Musculoskeletal Disorders, Minor Complexity                          |
| Non Subspecialty Surgery | J65A | Trauma to Skin, Subcutaneous Tissue and Breast, Major Complexity           |
| Non Subspecialty Surgery | J65B | Trauma to Skin, Subcutaneous Tissue and Breast, Minor Complexity           |
| Non Subspecialty Surgery | K09A | Other Endocrine, Nutritional and Metabolic OR Procedures, Major Complexity |
| Non Subspecialty Surgery | K09B | Other Endocrine, Nutritional and Metabolic OR Procedures, Minor Complexity |
| Non Subspecialty Surgery | M05Z | Circumcision                                                               |
| Non Subspecialty Surgery | Q02A | Blood and Immune System Disorders W Other OR Procedures, Major Complexity  |
| Non Subspecialty Surgery | Q02B | Blood and Immune System Disorders W Other OR Procedures, Minor Complexity  |
| Non Subspecialty Surgery | T01A | Infectious and Parasitic Diseases W OR Procedures, Major Complexity        |
| Non Subspecialty Surgery | T01B | Infectious and Parasitic Diseases W OR Procedures, Intermediate Complexity |
| Non Subspecialty Surgery | T01C | Infectious and Parasitic Diseases W OR Procedures, Minor Complexity        |
| Non Subspecialty Surgery | T61A | Postoperative and Post-Traumatic Infections, Major Complexity              |
| Non Subspecialty Surgery | T61B | Postoperative and Post-Traumatic Infections, Minor Complexity              |
| Non Subspecialty Surgery | W04A | Multiple Significant Trauma W Other OR Procedures, Major Complexity        |
| Non Subspecialty Surgery | W04B | Multiple Significant Trauma W Other OR Procedures, Minor Complexity        |

|                          |      |                                                                                 |
|--------------------------|------|---------------------------------------------------------------------------------|
| Non Subspecialty Surgery | W60Z | Multiple Trauma, Died or Transferred to Acute Facility <5 Days                  |
| Non Subspecialty Surgery | W61A | Multiple Significant Trauma W/O OR Procedures, Major Complexity                 |
| Non Subspecialty Surgery | W61B | Multiple Significant Trauma W/O OR Procedures, Minor Complexity                 |
| Non Subspecialty Surgery | X04A | Other Procedures for Injuries to Lower Limb, Major Complexity                   |
| Non Subspecialty Surgery | X04B | Other Procedures for Injuries to Lower Limb, Minor Complexity                   |
| Non Subspecialty Surgery | X06A | Other Procedures for Other Injuries, Major Complexity                           |
| Non Subspecialty Surgery | X06B | Other Procedures for Other Injuries, Intermediate Complexity                    |
| Non Subspecialty Surgery | X06C | Other Procedures for Other Injuries, Minor Complexity                           |
| Non Subspecialty Surgery | X40Z | Injuries, Poisoning and Toxic Effects of Drugs W Ventilator Support             |
| Non Subspecialty Surgery | X60A | Injuries, Major Complexity                                                      |
| Non Subspecialty Surgery | X60B | Injuries, Minor Complexity                                                      |
| Non Subspecialty Surgery | X63A | Sequelae of Treatment, Major Complexity                                         |
| Non Subspecialty Surgery | X63B | Sequelae of Treatment, Minor Complexity                                         |
| Non Subspecialty Surgery | Y03Z | Other OR Procedures for Other Burns                                             |
| Non Subspecialty Surgery | Y62A | Other Burns, Major Complexity                                                   |
| Non Subspecialty Surgery | Y62B | Other Burns, Minor Complexity                                                   |
| Non Subspecialty Surgery | Y62C | Other Burns, Sameday                                                            |
| Non Subspecialty Surgery | Z01A | Other Contacts W Health Services W OR Procedures, Major Complexity              |
| Non Subspecialty Surgery | Z01B | Other Contacts W Health Services W OR Procedures, Minor Complexity              |
| Transplantation          | A01Z | Liver Transplant                                                                |
| Transplantation          | A03Z | Lung or Heart-Lung Transplant                                                   |
| Transplantation          | A05Z | Heart Transplant                                                                |
| Transplantation          | A07A | Allogeneic Bone Marrow Transplant, Age <=16 Years or Major Complexity           |
| Transplantation          | A07B | Allogeneic Bone Marrow Transplant, Age >=17 Years and Minor Complexity          |
| Transplantation          | A08A | Autologous Bone Marrow Transplant, Major Complexity                             |
| Transplantation          | A08B | Autologous Bone Marrow Transplant, Minor Complexity                             |
| Transplantation          | A09A | Kidney Transplant, Age <=16 Years or Major Complexity                           |
| Transplantation          | A09B | Kidney Transplant, Age >=17 Years and Minor Complexity                          |
| Extensive Burns          | Y01Z | Vent >=96hrs or Trach for Burns or OR Procs for Severe Full Thickness Burns     |
| Extensive Burns          | Y02A | Skin Grafts for Other Burns, Major Complexity                                   |
| Extensive Burns          | Y02B | Skin Grafts for Other Burns, Intermediate Complexity                            |
| Extensive Burns          | Y02C | Skin Grafts for Other Burns, Minor Complexity                                   |
| Extensive Burns          | Y03A | Other OR Procedures for Other Burns, Major Complexity                           |
| Extensive Burns          | Y03B | Other OR Procedures for Other Burns, Minor Complexity                           |
| Extensive Burns          | Y60Z | Burns, Transferred to Acute Facility <5 Days                                    |
| Extensive Burns          | Y61Z | Severe Burns                                                                    |
| Tracheostomy             | A06A | Tracheostomy and/or Ventilation >=96hours, Major Complexity                     |
| Tracheostomy             | A06B | Tracheostomy and/or Ventilation >=96hours, Intermediate Complexity              |
| Tracheostomy             | A06C | Tracheostomy and/or Ventilation >=96hours, Minor Complexity                     |
| Gynaecology              | N01A | Pelvic Evisceration and Radical Vulvectomy, Major Complexity                    |
| Gynaecology              | N01B | Pelvic Evisceration and Radical Vulvectomy, Minor Complexity                    |
| Gynaecology              | N04A | Hysterectomy for Non-Malignancy, Major Complexity                               |
| Gynaecology              | N04B | Hysterectomy for Non-Malignancy, Minor Complexity                               |
| Gynaecology              | N05A | Oophorectomy and Complex Fallopian Tube Procedures for Non-Malignancy, Maj Comp |
| Gynaecology              | N05B | Oophorectomy and Complex Fallopian Tube Procedures for Non-Malignancy, Min Comp |
| Gynaecology              | N06A | Female Reproductive System Reconstructive Procedures, Major Complexity          |

|                |      |                                                                            |
|----------------|------|----------------------------------------------------------------------------|
| Gynaecology    | N06B | Female Reproductive System Reconstructive Procedures, Minor Complexity     |
| Gynaecology    | N06Z | Female Reproductive System Reconstructive Procedures                       |
| Gynaecology    | N07A | Other Uterus and Adnexa Procedures for Non-Malignancy, Major Complexity    |
| Gynaecology    | N07B | Other Uterus and Adnexa Procedures for Non-Malignancy, Minor Complexity    |
| Gynaecology    | N08Z | Endoscopic and Laparoscopic Procedures, Female Reproductive System         |
| Gynaecology    | N09Z | Other Vagina, Cervix and Vulva Procedures                                  |
| Gynaecology    | N10Z | Diagnostic Curettage and Diagnostic Hysteroscopy                           |
| Gynaecology    | N11A | Other Female Reproductive System OR Procedures, Major Complexity           |
| Gynaecology    | N11B | Other Female Reproductive System OR Procedures, Minor Complexity           |
| Gynaecology    | N11Z | Other Female Reproductive System OR Procedures                             |
| Gynaecology    | N61A | Female Reproductive System Infections, Major Complexity                    |
| Gynaecology    | N61B | Female Reproductive System Infections, Minor Complexity                    |
| Gynaecology    | N61Z | Female Reproductive System Infections                                      |
| Gynaecology    | N62A | Menstrual and Other Female Reproductive System Disorders, Major Complexity |
| Gynaecology    | N62B | Menstrual and Other Female Reproductive System Disorders, Minor Complexity |
| Gynaecology    | N62Z | Menstrual and Other Female Reproductive System Disorders                   |
| Gynaecology    | O03A | Ectopic Pregnancy, Major Complexity                                        |
| Gynaecology    | O03B | Ectopic Pregnancy, Minor Complexity                                        |
| Gynaecology    | O04A | Postpartum and Post Abortion W OR Procedures, Major Complexity             |
| Gynaecology    | O04B | Postpartum and Post Abortion W OR Procedures, Minor Complexity             |
| Gynaecology    | O04C | Postpartum and Post Abortion W OR Procedures, Sameday                      |
| Gynaecology    | O05Z | Abortion W OR Procedures                                                   |
| Gynaecology    | O63A | Abortion W/O OR Procedures, Major Complexity                               |
| Gynaecology    | O63B | Abortion W/O OR Procedures, Minor Complexity                               |
| Obstetrics     | O01A | Caesarean Delivery, Major Complexity                                       |
| Obstetrics     | O01B | Caesarean Delivery, Intermediate Complexity                                |
| Obstetrics     | O01C | Caesarean Delivery, Minor Complexity                                       |
| Obstetrics     | O02A | Vaginal Delivery W OR Procedures, Major Complexity                         |
| Obstetrics     | O02B | Vaginal Delivery W OR Procedures, Minor Complexity                         |
| Obstetrics     | O60A | Vaginal Delivery, Major Complexity                                         |
| Obstetrics     | O60B | Vaginal Delivery, Intermediate Complexity                                  |
| Obstetrics     | O60C | Vaginal Delivery, Minor Complexity                                         |
| Obstetrics     | O61A | Postpartum and Post Abortion W/O OR Procedures, Major Complexity           |
| Obstetrics     | O61B | Postpartum and Post Abortion W/O OR Procedures, Minor Complexity           |
| Obstetrics     | O61Z | Postpartum and Post Abortion W/O OR Procedures                             |
| Obstetrics     | O63Z | Abortion W/O OR Procedures                                                 |
| Obstetrics     | O66A | Antenatal and Other Obstetric Admissions, Major Complexity                 |
| Obstetrics     | O66B | Antenatal and Other Obstetric Admissions, Minor Complexity                 |
| Obstetrics     | O66C | Antenatal and Other Obstetric Admissions, Sameday                          |
| Drug & Alcohol | V60A | Alcohol Intoxication and Withdrawal, Major Complexity                      |
| Drug & Alcohol | V60B | Alcohol Intoxication and Withdrawal, Minor Complexity                      |
| Drug & Alcohol | V61A | Drug Intoxication and Withdrawal, Major Complexity                         |
| Drug & Alcohol | V61B | Drug Intoxication and Withdrawal, Minor Complexity                         |
| Drug & Alcohol | V61Z | Drug Intoxication and Withdrawal                                           |
| Drug & Alcohol | V62A | Alcohol Use and Dependence, Major Complexity                               |
| Drug & Alcohol | V62B | Alcohol Use and Dependence, Minor Complexity                               |
| Drug & Alcohol | V62Z | Alcohol Use and Dependence                                                 |

|                |      |                                                                                 |
|----------------|------|---------------------------------------------------------------------------------|
| Drug & Alcohol | V63Z | Opioid Use and Dependence                                                       |
| Drug & Alcohol | V64Z | Other Drug Use and Dependence                                                   |
| Drug & Alcohol | V65Z | Treatment for Alcohol Disorders, Sameday                                        |
| Drug & Alcohol | V66Z | Treatment for Drug Disorders, Sameday                                           |
| Drug & Alcohol | X40A | Injuries, Poisoning and Toxic Effects of Drugs W Ventilator Support, Major Comp |
| Drug & Alcohol | X40B | Injuries, Poisoning and Toxic Effects of Drugs W Ventilator Support, Minor Comp |
| Drug & Alcohol | X62A | Poisoning/Toxic Effects of Drugs and Other Substances, Major Complexity         |
| Drug & Alcohol | X62B | Poisoning/Toxic Effects of Drugs and Other Substances, Minor Complexity         |
| Psychiatry     | U40Z | Mental Health Treatment W ECT, Sameday                                          |
| Psychiatry     | U60A | Mental Health Treatment W/O ECT, Sameday, Major Complexity                      |
| Psychiatry     | U60B | Mental Health Treatment W/O ECT, Sameday, Minor Complexity                      |
| Psychiatry     | U60Z | Mental Health Treatment W/O ECT, Sameday                                        |
| Psychiatry     | U61A | Schizophrenia Disorders, Major Complexity                                       |
| Psychiatry     | U61B | Schizophrenia Disorders, Minor Complexity                                       |
| Psychiatry     | U62A | Paranoia and Acute Psychotic Disorders, Major Complexity                        |
| Psychiatry     | U62B | Paranoia and Acute Psychotic Disorders, Minor Complexity                        |
| Psychiatry     | U63A | Major Affective Disorders, Major Complexity                                     |
| Psychiatry     | U63B | Major Affective Disorders, Minor Complexity                                     |
| Psychiatry     | U64A | Other Affective and Somatoform Disorders, Major Complexity                      |
| Psychiatry     | U64B | Other Affective and Somatoform Disorders, Minor Complexity                      |
| Psychiatry     | U64Z | Other Affective and Somatoform Disorders                                        |
| Psychiatry     | U65A | Anxiety Disorders, Major Complexity                                             |
| Psychiatry     | U65B | Anxiety Disorders, Minor Complexity                                             |
| Psychiatry     | U65Z | Anxiety Disorders                                                               |
| Psychiatry     | U66A | Eating and Obsessive-Compulsive Disorders, Major Complexity                     |
| Psychiatry     | U66B | Eating and Obsessive-Compulsive Disorders, Minor Complexity                     |
| Psychiatry     | U66Z | Eating and Obsessive-Compulsive Disorders                                       |
| Psychiatry     | U67A | Personality Disorders and Acute Reactions, Major Complexity                     |
| Psychiatry     | U67B | Personality Disorders and Acute Reactions, Minor Complexity                     |
| Psychiatry     | U67Z | Personality Disorders and Acute Reactions                                       |
| Unallocated    | 801A | OR Procedures Unrelated to Principal Diagnosis, Major Complexity                |
| Unallocated    | 801B | OR Procedures Unrelated to Principal Diagnosis, Intermediate Complexity         |
| Unallocated    | 801C | OR Procedures Unrelated to Principal Diagnosis, Minor Complexity                |
| Unallocated    | 960Z | Ungroupable                                                                     |
| Unallocated    | 961Z | Unacceptable Principal Diagnosis                                                |

**Table S2:** Uni-variate associations with prolonged hospital length of stay for patients hospitalised over two years in Victoria, Australia

| Variable                                    | Overall        | Length of stay (days) |               | P-value* |
|---------------------------------------------|----------------|-----------------------|---------------|----------|
|                                             |                | 1-13                  | ≥14           |          |
| Number of cases                             | 1696112        | 1532662 (90.4)        | 163450 (9.6)  |          |
| Female (n, %)                               | 877020 (51.7)  | 788874 (51.5)         | 88146 (53.9)  | <0.001   |
| Number (%) aged ≥65 years                   | 881090 (51.9)  | 770683 (50.3)         | 110227 (67.4) | <0.001   |
| Married or defacto relationship             | 955280 (56.3)  | 882026 (57.6)         | 73254 (44.8)  | <0.001   |
| Indigenous population                       | 13888 (0.8)    | 12733 (0.8)           | 1155 (0.7)    | <0.001   |
| Charlson co-morbidity Index* n (%)          |                |                       |               |          |
| 0                                           | 978956 (57.7)  | 916511 (59.8)         | 62445 (38.2)  |          |
| 1-2                                         | 485591 (28.6)  | 426423 (27.8)         | 59168 (36.2)  |          |
| 3-4                                         | 114398 (6.7)   | 92390 (6.0)           | 22008 (13.5)  |          |
| 5-6                                         | 24080 (1.4)    | 19012 (1.2)           | 5068 (3.1)    |          |
| >6                                          | 93087 (5.5)    | 78326 (5.1)           | 14761 (9.0)   | <0.001   |
| Current smoker n(%)                         | 182178 (10.7)  | 164263 (10.7)         | 17915 (11.0)  | 0.003    |
| DRG (Medical)                               | 1044369 (61.6) | 916416 (59.8)         | 127953 (78.3) | <0.001   |
| Emergency (unscheduled) admission n (%)     | 839360 (49.5)  | 783477 (51.1)         | 55883 (34.2)  | <0.001   |
| ICU Stay                                    | 79,115 (4.7)   | 61027 (4.0)           | 18088 (11.1)  | <0.001   |
| No. of admissions past 12 months n (%)      |                |                       |               |          |
| 0                                           | 711166 (41.9)  | 676363 (44.1)         | 34803 (21.3)  |          |
| 1                                           | 374576 (22.1)  | 334055 (21.8)         | 40521 (24.8)  |          |
| ≥2                                          | 610370 (36.0)  | 522244 (34.1)         | 88126 (53.9)  | <0.001   |
| Admission source, n (%)                     |                |                       |               |          |
| Home                                        | 1442065 (85.0) | 1355996 (88.5)        | 86069 (52.7)  |          |
| Age care residential facility               | 11302 (0.7)    | 10317 (0.7)           | 985 (0.6)     |          |
| From another hospital                       | 195230 (11.5)  | 136540 (8.9)          | 58690 (35.9)  |          |
| Other                                       | 47515 (2.8)    | 29809 (1.9)           | 17706 (10.8)  | <0.001   |
| Admitted on a weekend, n (%)                | 573292 (33.8)  | 515274 (33.6)         | 58018 (35.5)  | <0.001   |
| Season n (%)                                |                |                       |               |          |
| Spring (Sep-Nov)                            | 406209 (24.0)  | 370344 (24.1)         | 35865 (21.9)  |          |
| Summer (Dec-Feb)                            | 415172 (24.5)  | 374786 (24.5)         | 40386 (24.7)  |          |
| Autumn (Mar-May)                            | 433328 (25.6)  | 390402 (25.5)         | 42926 (26.3)  |          |
| Winter (Jun-Aug)                            | 441403 (26.0)  | 397130 (25.9)         | 44273 (27.1)  | <0.001   |
| Risk category based on admission unit n (%) |                |                       |               |          |
| 1                                           | 659004 (38.9)  | 633300 (41.3)         | 25704 (15.7)  |          |
| 2                                           | 503703 (29.7)  | 451536 (29.5)         | 52167 (31.9)  |          |
| 3                                           | 387474 (22.8)  | 344182 (22.5)         | 43292 (26.5)  |          |
| 4                                           | 145931 (8.6)   | 103644 (6.7)          | 42287 (25.9)  | <0.001   |

DRG = diagnostic related group, ICU = intensive care unit; \*based on chi-squared tests

**Table S3:** Associations with prolonged hospitalization ( $\geq 14$  days) for patients hospitalized over two years in Victoria, Australia who were discharged alive

| Variable                          | Longer LOS (odds ratio [OR], 95% CI) |
|-----------------------------------|--------------------------------------|
| Age groups, years.                |                                      |
| 20-24                             | 0.74 (0.71-0.77)                     |
| 25-29                             | 0.84 (0.81-0.88)                     |
| 30-34                             | 0.97 (0.94-1.02)                     |
| 35-39                             | 1.01 (0.97-1.06)                     |
| 40-44                             | 0.98 (0.94-1.02)                     |
| 45-49                             | 0.96 (0.93-0.99)                     |
| 50-54                             | 0.96 (0.93-0.99)                     |
| 55-59                             | 0.95 (0.92-0.98)                     |
| 60-64                             | reference                            |
| 65-69                             | 1.02 (0.99-1.05)                     |
| 70-74                             | 1.16 (1.12-1.19)                     |
| 75-79                             | 1.48 (1.44-1.52)                     |
| 80-84                             | 1.82 (1.76-1.87)                     |
| $\geq 85$                         | 2.38 (2.32-2.45)                     |
| Female gender                     | 1.09 (1.08-1.11)                     |
| Indigenous population             |                                      |
| Yes                               | 0.90 (0.84-0.96)                     |
| No                                | 1.0 [reference]                      |
| Undefined                         | 1.15 (1.09-1.21)                     |
| Charlson co-morbidity Index* n    |                                      |
| 0                                 | 1.0 [reference]                      |
| 1-2                               | 1.44 (1.42-1.46)                     |
| 3-4                               | 2.06 (2.02-2.10)                     |
| 5-6                               | 2.20 (2.12-2.29)                     |
| >6                                | 0.92 (0.90-0.95)                     |
| Marital Status                    |                                      |
| Never married                     | 1.60 (1.57-1.63)                     |
| Widowed                           | 1.27 (1.25-1.29)                     |
| Married or defacto                | 1.0 [reference]                      |
| Divorced or separated             | 1.38 (1.35-1.41)                     |
| Other                             | 1.32 (1.27-1.38)                     |
| Current smoker                    | 1.27 (1.24-1.29)                     |
| DRG type                          |                                      |
| Medical                           | 1.0 [reference]                      |
| Surgical                          | 0.60 (0.59-0.61)                     |
| Other                             | 0.79 (0.76-0.82)                     |
| Emergency (unscheduled) admission | 0.64 (0.63-0.65)                     |
| Admission source                  |                                      |
| Home                              | 1.0 [reference]                      |
| Aged care residential facility    | 1.03 (0.96-1.10)                     |
| From another hospital             | 4.35 (4.28-4.42)                     |
| Other                             | 4.85 (4.73-4.97)                     |
| ICU stay                          | 3.46 (3.38-3.54)                     |
| Admitted on weekend               | 1.07 (1.05-1.08)                     |
| Season of admission               |                                      |
| Spring (Sep-Nov)                  | 1.0 [reference]                      |
| Summer (Dec-Feb)                  | 1.17 (1.15-1.19)                     |
| Autumn (Mar-May)                  | 1.16 (1.14-1.18)                     |
| Winter (Jun-Aug)                  | 1.15 (1.13-1.17)                     |
| Prior admissions (in 12 months)   |                                      |
| 0                                 | reference                            |
| 1                                 | 1.20 (1.18-1.22)                     |
| $\geq 2$                          | 1.30 (1.28-1.32)                     |

| Risk category based on admission unit |                  |
|---------------------------------------|------------------|
| 1                                     | 1.0 [reference]  |
| 2                                     | 1.88 (1.85-1.91) |
| 3                                     | 2.45 (2.41-2.49) |
| 4                                     | 8.97 (8.79-9.16) |

**Table S4:** Uni-variate associations with in-hospital mortality for patients hospitalized over two years in Victoria, Australia

| Variable                                     | Overall         | Death          |              | P-value* |
|----------------------------------------------|-----------------|----------------|--------------|----------|
|                                              |                 | No             | Yes          |          |
| Number of cases                              | 1696112 (100.0) | 1660825 (97.9) | 35287 (2.1)  | -        |
| Female (n, %)                                | 877020 (51.7)   | 860667 (51.8)  | 16353 (46.3) | <0.001   |
| Number (%) aged ≥65 years                    | 881090 (51.9)   | 851853 (51.3)  | 29237 (82.9) | <0.001   |
| Married or defacto relationship              | 955280 (56.3)   | 936807 (56.4)  | 18473 (52.4) | <0.001   |
| Indigenous population                        | 13888 (0.8)     | 13706 (0.8)    | 182 (0.5)    | <0.001   |
| Charlson co-morbidity Index* n (%)           |                 |                |              |          |
| 0                                            | 978956 (57.7)   | 975446 (58.7)  | 3510 (10.0)  |          |
| 1-2                                          | 485591 (28.6)   | 474109 (28.6)  | 11482 (32.5) |          |
| 3-4                                          | 114398 (6.7)    | 108023 (6.5)   | 6375 (18.1)  |          |
| 5-6                                          | 24080 (1.4)     | 21967 (1.3)    | 2113 (6.0)   |          |
| >6                                           | 93087 (5.5)     | 81280 (4.9)    | 11807 (33.5) | <0.001   |
| Current smoker n (%)                         | 182178 (10.7)   | 180043 (10.8)  | 235 (6.1)    | <0.001   |
| DRG (Medical)                                | 1044369 (61.6)  | 1014769 (61.1) | 29600 (83.9) | <0.001   |
| Emergency (unscheduled) admission n (%)      | 839360 (49.5)   | 820075 (49.4)  | 19285 (54.7) | <0.001   |
| ICU Stay                                     | 79115 (4.7)     | 73424 (4.4)    | 5691 (16.1)  | <0.001   |
| No. of admissions past 12 months n (%)       |                 |                |              |          |
| 0                                            | 711166 (41.9)   | 704000 (42.4)  | 7166 (20.3)  |          |
| 1                                            | 374576 (22.1)   | 368553 (22.2)  | 6023 (17.1)  |          |
| ≥2                                           | 610370 (36.0)   | 588272 (35.4)  | 22098 (62.6) | <0.001   |
| Admission source, n (%)                      |                 |                |              |          |
| Home                                         | 1442065 (85.0)  | 1419584 (85.5) | 22481 (63.7) |          |
| Age care residential facility                | 11302 (0.7)     | 10418 (0.6)    | 884 (2.5)    |          |
| From another hospital                        | 195230 (11.5)   | 187394 (11.3)  | 7836 (22.2)  |          |
| Other                                        | 47515 (2.8)     | 43429 (2.6)    | 4086 (11.6)  | <0.001   |
| Admitted on a weekend, n (%)                 | 573292 (33.8)   | 562001 (33.8)  | 11291 (32.0) | <0.001   |
| Season n (%)                                 |                 |                |              |          |
| Spring (Sep-Nov)                             | 406209 (24.0)   | 398017 (24.0)  | 8192 (23.2)  |          |
| Summer (Dec-Feb)                             | 415172 (24.5)   | 406962 (24.5)  | 8210 (23.3)  |          |
| Autumn (Mar-May)                             | 433328 (25.5)   | 424127 (25.5)  | 9201 (26.1)  |          |
| Winter (Jun-Aug)                             | 441403 (26.0)   | 431719 (26.0)  | 9684 (27.4)  | <0.001   |
| Risk category based on admission unit, n (%) |                 |                |              |          |
| 1                                            | 659004 (38.9)   | 653279 (39.3)  | 5725 (16.2)  |          |
| 2                                            | 503703 (29.7)   | 489964 (29.5)  | 13739 (38.9) |          |
| 3                                            | 387474 (22.8)   | 383104 (23.1)  | 4370 (12.4)  |          |
| 4                                            | 145931 (8.6)    | 134478 (8.1)   | 11453 (32.5) | <0.001   |
| Median LOS (IQR)                             | 3 (1-6)         | 3 (1-6)        | 6 (2-13)     | <0.001   |

DRG = diagnostic related group, ICU = intensive care unit, LOS = length of stay; \*based on chi-squared tests

**Table S5** Nature and destination of discharge among people who survived in hospital for patients hospitalized over two years in Victoria, Australia

| Discharge destination                                                                        | Number (%)     |
|----------------------------------------------------------------------------------------------|----------------|
| All alive                                                                                    | 1660825 (100)  |
| Discharge and transfer to mental health residential facility                                 | 2814 (0.2)     |
| Discharge and transfer to Transition Care bed-based program                                  | 7775 (0.5)     |
| Posthumous Organ Procurement                                                                 | 107 (0.01)     |
| Discharge to private residence/accommodation                                                 | 1388194 (83.6) |
| Discharge and transfer to aged care residential facility                                     | 42051 (2.5)    |
| Statistical discharge (change in Care Type within this hospital)                             | 47877 (2.9)    |
| Discharge and transfer to other acute hospital/extended care/rehabilitation/geriatric centre | 159160 (9.6)   |
| Left against medical advice                                                                  | 12847 (0.8)    |



**Table S6:** Independent associations with hospital discharge to home for patients hospitalised over two years in Victoria, Australia

| Variable                          | (odds ratio [OR], 95% CI) |
|-----------------------------------|---------------------------|
| Age groups, yrs.                  |                           |
| 20-24                             | 2.16 (2.08-2.25)          |
| 25-29                             | 2.01 (1.94-2.08)          |
| 30-34                             | 1.83 (1.77-1.90)          |
| 35-39                             | 1.60 (1.55-1.66)          |
| 40-44                             | 1.58 (1.53-1.63)          |
| 45-49                             | 1.51 (1.46-1.56)          |
| 50-54                             | 1.35 (1.32-1.39)          |
| 55-59                             | 1.19 (1.16-1.22)          |
| 60-64                             | reference                 |
| 65-69                             | 0.83 (0.81-0.85)          |
| 70-74                             | 0.68 (0.67-0.70)          |
| 75-79                             | 0.54 (0.53-0.55)          |
| 80-84                             | 0.42 (0.41-0.43)          |
| ≥85                               | 0.30 (0.29-0.31)          |
| Female gender                     | 0.94 (0.93-0.95)          |
| Indigenous population             |                           |
| Yes                               | 0.75 (0.71-0.79)          |
| No                                | 1.0 [reference]           |
| Undefined                         | 0.98 (0.93-1.02)          |
| Charlson co-morbidity Index* n    |                           |
| 0                                 | 1.0 [reference]           |
| 1-2                               | 0.75 (0.74-0.76)          |
| 3-4                               | 0.57 (0.56-0.58)          |
| 5-6                               | 0.50 (0.48-0.52)          |
| >6                                | 0.59 (0.58-0.60)          |
| Marital Status                    |                           |
| Never married                     | 0.61 (0.60-0.61)          |
| Widowed                           | 0.75 (0.74-0.76)          |
| Married or defacto                | 1.0 [reference]           |
| Divorced or separated             | 0.67 (0.66-0.68)          |
| Other                             | 0.69 (0.67-0.72)          |
| Current smoker                    | 0.88 (0.86-0.89)          |
| DRG type                          |                           |
| Medical                           | 1.0 [reference]           |
| Surgical                          | 0.95 (0.94-0.96)          |
| Other                             | 1.25 (1.22-1.29)          |
| Emergency (unscheduled) admission | 0.42 (0.41-0.43)          |
| Admission source                  |                           |
| Home                              | 1.0 [reference]           |
| Aged care residential facility    | 0.13 (0.12-0.13)          |
| From another hospital             | 0.48 (0.47-0.48)          |
| Other                             | 0.33 (0.32-0.34)          |
| ICU stay                          | 0.40 (0.39-0.42)          |
| Admitted on weekend               | 1.00 (0.99-1.01)          |
| Season of admission               |                           |
| Spring (Sep-Nov)                  | 1.0 [reference]           |
| Summer (Dec-Feb)                  | 0.96 (0.94-0.97)          |
| Autumn (Mar-May)                  | 0.96 (0.94-0.97)          |
| Winter (Jun-Aug)                  | 0.98 (0.96-0.99)          |
| Prior admissions (in 12 months)   |                           |
| 0                                 | reference                 |
| 1                                 | 1.13 (1.12-1.15)          |
| ≥2                                | 0.94 (0.92-0.95)          |

| Risk category based on admission unit   |                  |
|-----------------------------------------|------------------|
| 1                                       | 1.0 [reference]  |
| 2                                       | 0.62 (0.61-0.63) |
| 3                                       | 0.34 (0.34-0.35) |
| 4                                       | 0.49 (0.38-0.50) |
| Longer length of stay ( $\geq 14$ days) | 0.53 (0.52-0.54) |

DRG = diagnostic related group, ICU = intensive care unit, LOS = length of stay

**Table S7:** Summary of literature describing epidemiology of prolonged hospitalisations 2015 to 2019.

| <b>Details of study</b>                        | <b>Cohort and setting</b>                                                                                                                                                                                                                                         | <b>Details of long stay patients<br/>LOS = length of stay</b>                                                                                                                                                                                                                 | <b>Baseline variables and complications associated with long stay</b>                                                                                                                                                                                                                                                                                                                                                        |
|------------------------------------------------|-------------------------------------------------------------------------------------------------------------------------------------------------------------------------------------------------------------------------------------------------------------------|-------------------------------------------------------------------------------------------------------------------------------------------------------------------------------------------------------------------------------------------------------------------------------|------------------------------------------------------------------------------------------------------------------------------------------------------------------------------------------------------------------------------------------------------------------------------------------------------------------------------------------------------------------------------------------------------------------------------|
| Marfil-Garza et al<br>2018<br>Mexico           | 85904 hospitalisations between Jan 2000 and Dec 2017 with LOS $\geq$ one day<br>Single centre study<br>Public tertiary in Mexico city<br>167 hospital beds with 4772 admissions annually<br>Median age = 51 (35-66) yr<br>Surgery performed 41.8%<br>55.6% female | Prolonged LOS was $>$ 95 <sup>th</sup> centile ( $\geq$ 34 days)<br><br>Overall median hospital LOS = 8 (5-14) days<br><br>5.1% of admissions had prolonged LOS<br>Prolonged LOS used 23.1% of total bed days<br><br>The risk of mortality of prolonged LOS was 13.3% vs 3.7% | Prolonged LOS was associated with <ul style="list-style-type: none"> <li>• Younger age</li> <li>• Male gender</li> <li>• Emergency and weekend admission</li> <li>• Surgery</li> <li>• Number of co-morbidities</li> <li>• Lower socio-economic status</li> <li>• Lower patient-to-physician ratio</li> <li>• Bone marrow transplantation</li> <li>• Complex infectious conditions</li> <li>• Intestinal fistulae</li> </ul> |
| Lisk et al<br>2019<br>United Kingdom<br>Surrey | 374 patients with 23 acute conditions<br><br>Single centre study<br><br>Median age 85 (78-90) yr<br>34% men                                                                                                                                                       | Prolonged LOS = LOS $>$ 5 <sup>th</sup> quintile (17 days)<br><br>Median LOS = 6.5 (1.8-14.8) days<br>Mortality = 10.2% overall<br><br>Prolonged LOS was associated with discharge to places other than usual residence = OR 3.1 (1.7-5.7)                                    | Prolonged LOS was associated with <ul style="list-style-type: none"> <li>• Acute stroke</li> <li>• Acute first hip fracture</li> <li>• Recurrent hip fracture</li> <li>• Urinary tract infection/pneumonia</li> <li>• Acute malignancy</li> </ul>                                                                                                                                                                            |
| Crisafulli et al<br>2018<br>Spain              | May 2009 to May 2016<br>437 patients with exacerbations of COAD<br>Single centre study<br>Median age approx 72 yr<br>Approx. 80% male                                                                                                                             | LOS longer than 7 days<br>224 (51.2%) had LOS $>$ 7 days<br><br>Increase ventilation and ICU admission<br>Increased 6 month, 1 year and 3 year mortality                                                                                                                      | Prolonged LOS was associated with <ul style="list-style-type: none"> <li>• mMRC dyspnoea score <math>\geq</math> 2</li> <li>• acute respiratory acidosis</li> </ul>                                                                                                                                                                                                                                                          |
| Thomas et al<br>2018<br>Philadelphia USA       | Retrospective study 2012 to 2014<br><br>Multi-centre study<br>1115 cases of head and neck malignancy with free tissue transfer flap<br><br>33.2% female<br>Mean (SD) age 66.8 (3.9) yr                                                                            | Prolonged LOS at least 13 days (top quartile of duration of LOS)                                                                                                                                                                                                              | Prolonged LOS was associated with <ul style="list-style-type: none"> <li>• Return to the operating room</li> <li>• Smoking</li> <li>• Clean-contaminated wound</li> <li>• Age</li> <li>• Bony flap</li> <li>• Operative time</li> </ul>                                                                                                                                                                                      |
| Nguyen et al<br>2019<br>Vietnam                | 461 elderly patients admitted to hospital<br>Single centre study<br>Mean age 76.2 $\pm$ 8.9 yr<br>56.8% female                                                                                                                                                    | Prolonged hospitalisation = exceeded 75 <sup>th</sup> centile ( $>$ 18 days)<br><br>Prolonged hospitalisation was seen in 106 / 461 = 23.0%                                                                                                                                   | Prolonged LOS was associated with <ul style="list-style-type: none"> <li>• Clinical frailty</li> </ul>                                                                                                                                                                                                                                                                                                                       |
| Agosti et al<br>2018<br>Italy and Spain        | 1894 patients 2012-2016<br>Acutely admitted elderly patients<br>Multi-centre study<br><br>Mean age approx. 79 yr<br>48.6% male                                                                                                                                    | Study examined associations with living alone after adjusting for other variables<br><br>Mean length of stay = <ul style="list-style-type: none"> <li>• 13.1 <math>\pm</math> 11.6 days (living alone)</li> </ul> 11.6 $\pm$ 9.3 days (not living alone)                      | In four different statistical modules living alone was associated with longer hospital LOS                                                                                                                                                                                                                                                                                                                                   |
| Rana et al<br>Houston, USA<br>2017             | 73635 liver transplants<br>March 2002 to June 2016<br>In organ procurement and transplantation network<br><br>Multi-centre study<br><br>Excluded multi-visceral transplant and deaths within one month<br><br>33.0% female                                        | Prolonged hospital stay $>$ 30 days<br><br>Mean hospital stay = 16.4 days                                                                                                                                                                                                     | Prolonged LOS was associated with <ul style="list-style-type: none"> <li>• ICU admission</li> <li>• Previous transplant</li> <li>• Hospital admission</li> <li>• Ventilator</li> <li>• Dialysis</li> <li>• Life support</li> <li>• Encephalopathy</li> <li>• TIPS</li> <li>• Ascites</li> <li>• Previous surgery</li> </ul>                                                                                                  |

|                                                  |                                                                                                                                                                               |                                                                                                                                                                        |                                                                                                                                                                                                                                                                                                                                                                                                                                                                                      |
|--------------------------------------------------|-------------------------------------------------------------------------------------------------------------------------------------------------------------------------------|------------------------------------------------------------------------------------------------------------------------------------------------------------------------|--------------------------------------------------------------------------------------------------------------------------------------------------------------------------------------------------------------------------------------------------------------------------------------------------------------------------------------------------------------------------------------------------------------------------------------------------------------------------------------|
|                                                  | Mean (SD) age = 54.3 ± 10.3 yr                                                                                                                                                |                                                                                                                                                                        | <ul style="list-style-type: none"> <li>Increasing age</li> <li>Increasing MELD</li> <li>Low serum Albumin</li> <li>High serum Na</li> </ul>                                                                                                                                                                                                                                                                                                                                          |
| Coelho et al<br>2018<br>Brasil                   | 1011 patients undergoing retropericubic radical prostatectomy Jan 2010 to Jan 2012<br><br>Single centre study<br><br>Median (IQR) age = 65.4 (60.2-69.7) years                | Median LOS = 2 days<br>217 (21.5%) of patients had prolonged hospitalisation (> 2days)                                                                                 | <p>Prolonged LOS was associated with</p> <ul style="list-style-type: none"> <li>CCI</li> <li>Age</li> <li>ASA score of 3</li> <li>Prostate volume</li> <li>Operative time</li> </ul> <ul style="list-style-type: none"> <li>Presence of any complications</li> <li>Major complications</li> </ul>                                                                                                                                                                                    |
| Wasfy et al<br>2018<br>Boston, USA               | 906324 patients discharged alive for acute myocardial infarction between Jul 2008 and Mar 2017<br>Multi-centre study<br>Mean age approx. 64 yr<br>Approx. 2/3 male            | 16.8% had prolonged LOS (≥ 7 days)                                                                                                                                     | <p>Prolonged LOS was associated with</p> <ul style="list-style-type: none"> <li>Older age</li> <li>Heart failure on admission</li> <li>Higher heart rate on admission</li> <li>Systolic blood pressure on admission</li> <li>Shock on admission</li> <li>Lower glomerular filtration rate</li> </ul> <p>Lower haemoglobin</p>                                                                                                                                                        |
| O'Sullivan et al<br>2017<br>Melbourne, Australia | 15623 adult (≥ 18 years) patients and 22094 multi-day admissions Jul 2013 to June 2014<br><br>Single centre study<br><br>Median age = 65 (47-78) yr<br>47.4% female           | Median LOS 4 (2-8) days<br><br>Long stay (≥14 days) comprised 13.1 % multi-day admissions but used 49.1% of bed days                                                   | <p>Prolonged LOS was associated with</p> <ul style="list-style-type: none"> <li>Multiple admission in the study period</li> <li>Admission from another hospital</li> <li>CCI</li> <li>History of smoking</li> <li>Nature of the admitted unit</li> <li>ICU admission</li> <li>Longer duration mechanical ventilation</li> <li>More frequent Medical emergency team review</li> </ul> <p>Increased risk of in-hospital death (8.2 vs 3.1%) and less likely to be discharged home.</p> |
| Tsilimigras et al<br>2019                        | 706 patients undergoing hepatectomy for intra-hepatic cholangiocarcinoma between 1990 and 2016<br>Multi-centre study<br><br>Median age = 57.9 (49.3-66.0) years<br>59.4% male | Prolonged LOS defined as > 10 days                                                                                                                                     | Prolonged LOS was associated with Increased Albumin-BR grade                                                                                                                                                                                                                                                                                                                                                                                                                         |
| Almogati et al<br>2019<br>Saudi Arabia           | 305 patients admitted for coronary artery bypass surgery Nov 2013 to May 2015<br><br>Single centre study<br><br>Mean age = 59.1years<br>Range = 31-87 years<br><br>82% male   | LOS ≥ 14 days proposed as an extended LOS = 64/305 (21.0%)<br><br>mean LOS = 11.8 ± 11.9 days<br><br>81.6% of patients had diabetes mellitus<br><br>64% had HbA1C ≥ 7% | <p>Prolonged LOS was associated with left ventricular ejection fraction</p> <p>Prolonged LOS was not associated with</p> <ul style="list-style-type: none"> <li>Increasing age</li> <li>Gender</li> <li>Hypertension</li> <li>Dyslipidemia</li> </ul>                                                                                                                                                                                                                                |
| Agrawal et al<br>2018<br>USA                     | 157589 women who underwent hysterectomy<br>52.8% minimally invasive<br>28.6% abdominal<br>18.6% vaginal<br><br>Multi-centre study<br><br>Approx. 90% less than 59 yr          | LOS above 75 <sup>th</sup> centile <ul style="list-style-type: none"> <li>1 day for minimally invasive</li> <li>3 days for abdominal</li> </ul> 2 days for vaginal     | <p>Baseline factors associated with prolonged LOS.</p> <ul style="list-style-type: none"> <li>Increasing age</li> <li>Diabetes</li> <li>Chronic obstructive airways disease</li> <li>Bleeding disorders</li> <li>Body mass index</li> <li>Functional status</li> <li>Total operative time</li> </ul>                                                                                                                                                                                 |

|                                  |                                                                                                                                                                                                        |                                                                                                                                                                                                                                                               |                                                                                                                                                                                                                                                                                                                                                                                                                                                                                                                                                                                                                     |
|----------------------------------|--------------------------------------------------------------------------------------------------------------------------------------------------------------------------------------------------------|---------------------------------------------------------------------------------------------------------------------------------------------------------------------------------------------------------------------------------------------------------------|---------------------------------------------------------------------------------------------------------------------------------------------------------------------------------------------------------------------------------------------------------------------------------------------------------------------------------------------------------------------------------------------------------------------------------------------------------------------------------------------------------------------------------------------------------------------------------------------------------------------|
|                                  |                                                                                                                                                                                                        |                                                                                                                                                                                                                                                               | Development of post-operative complications (wound infection, pneumonia, pulmonary embolism, deep venous thrombosis, urinary tract infection, sepsis, reoperation)                                                                                                                                                                                                                                                                                                                                                                                                                                                  |
| Fletcher et al<br>2018<br>USA    | 11430 patients undergoing laparoscopic sleeve gastrectomy between 2009 and 2012<br><br>Multi-centre study<br><br>Approx. ¾ female<br><br>More than 96% aged < 65 yr                                    | Prolonged LOS defined as $\geq 3$ days which occurred in 18.4%<br><br>Median LOS = 2 days                                                                                                                                                                     | Independent associations with prolonged LOS included: <ul style="list-style-type: none"> <li>• Age &gt; 65 yr</li> <li>• Female gender</li> <li>• Body mass index &gt; 50</li> <li>• Chronic obstructive pulmonary disease</li> <li>• Hypertension</li> <li>• Renal insufficiency</li> <li>• Anaemia</li> </ul> Prolonged operative time                                                                                                                                                                                                                                                                            |
| Agrawal et al<br>2018<br>USA     | 19084 women who underwent hysterectomy for uterine cancer from 2006 to 2015<br><br>31.9% abdominal<br>68.1% minimally invasive<br><br>Multi-centre study<br><br>Approx. 60% aged over 60 yrs           | LOS above 75 <sup>th</sup> centile <ul style="list-style-type: none"> <li>• 1 day for minimally invasive</li> <li>• 5 days for abdominal</li> </ul> The aim was to identify what proportion of prolonged LOS could be accounted for by the measured variables | In the abdominal group risk factors combined accounted for 23.6% of the variation in prolonged LOS. Demographic characteristics explained 4.0%, preoperative factors 7.0%, intraoperative factors 7.9%, and postoperative characteristics 9.7%.<br><br>In the minimally invasive group, the 75 <sup>th</sup> and 90 <sup>th</sup> percentiles for LOS were 1 and 2 days, respectively. The combined risk factors explained 16.2% of the variation in prolonged LOS. Demographic characteristics accounted for 6.2%, preoperative factors 4.1%, intraoperative factors 6.9%, and postoperative characteristics 1.3%. |
| Lee et al<br>2018<br>Singapore   | Adult surgical patients with hepato-biliary malignancy (150) and neurosurgery (166) between Jan 2014 and Jan 2015<br><br>Single centre study<br><br>Male gender approx. 40%<br>Mean age approx. 60 yrs | Prolonged LOS defined as above median LOS<br><br>Median LOS <ul style="list-style-type: none"> <li>• 6 (2-8) days for hepato-biliary cancer</li> <li>• 6 (4-9) days for neurosurgery</li> </ul>                                                               | Variables independently associated with prolonged LOS for hepato-biliary malignancy <ul style="list-style-type: none"> <li>• Increasing age</li> <li>• Admission after 5pm</li> <li>• Operation duration</li> </ul> Additional variables associated with prolonged LOS for neurosurgery <ul style="list-style-type: none"> <li>• Functional status</li> <li>• Number of hospital-acquired infections</li> <li>• Referral to occupational therapy</li> </ul>                                                                                                                                                         |
| Crawford et al<br>2018<br>USA    | 16723 patients undergoing heart transplantation between 2003 and 2012<br><br>Multi-centre study<br><br>Median age 55 (45-61) years<br><br>76% male                                                     | Prolonged LOS defined as > 30 days<br><br>Mean (SD) LOS = $19 \pm 21$ days<br><br>12.1% had LOS > 30 days                                                                                                                                                     | Variables independently associated with prolonged LOS included: <ul style="list-style-type: none"> <li>• Increasing age</li> <li>• Female gender</li> <li>• Karnofsky performance status</li> <li>• Renal impairment</li> <li>• History of dialysis</li> <li>• Intubation, IABP, ventricular assist device or ECMO pre-transplant</li> <li>• Previous cardiac surgery</li> </ul> Pulmonary hypertension                                                                                                                                                                                                             |
| Goltzman et al<br>2019<br>Israel | 275 general medical patients<br>1 March 2013 and 30 June 2013.<br>50.5% female<br>Mean age $68.3 \pm 17.0$ yrs<br>Single centre study                                                                  | Prolonged hospitalisation defined as > 7 days                                                                                                                                                                                                                 | C-reactive protein was associated with the risk of prolonged hospitalisation with AUC for ROC of 0.73                                                                                                                                                                                                                                                                                                                                                                                                                                                                                                               |
| Anderson et al<br>2015<br>USA    | 12511 general medical patients admitted 18363 times between Jan 2012 to Dec 2014                                                                                                                       | Prolonged LOS defined as > 21 days was observed in 2.3% of discharges<br><br>Prolonged hospitalisations accounted for 18.6% of total inpatient days                                                                                                           | Prolonged hospitalisation was associated with <ul style="list-style-type: none"> <li>• Younger age</li> <li>• MRSA septicaemia</li> </ul>                                                                                                                                                                                                                                                                                                                                                                                                                                                                           |

|                                       |                                                                                                                                                                                                                                                |                                                                                                                                                                                                                                                                    |                                                                                                                                                                                                                                                                                                                                                                                                                                                                                                                                                                                                                                                                                                                                                                                          |
|---------------------------------------|------------------------------------------------------------------------------------------------------------------------------------------------------------------------------------------------------------------------------------------------|--------------------------------------------------------------------------------------------------------------------------------------------------------------------------------------------------------------------------------------------------------------------|------------------------------------------------------------------------------------------------------------------------------------------------------------------------------------------------------------------------------------------------------------------------------------------------------------------------------------------------------------------------------------------------------------------------------------------------------------------------------------------------------------------------------------------------------------------------------------------------------------------------------------------------------------------------------------------------------------------------------------------------------------------------------------------|
|                                       | <p>Single centre study</p> <p>Mean age approx. 55 yr<br/>Approx. 50% female</p>                                                                                                                                                                |                                                                                                                                                                                                                                                                    | <ul style="list-style-type: none"> <li>• Require surgery &gt; 24 hr after admission</li> <li>• Need for palliative care consultation</li> </ul>                                                                                                                                                                                                                                                                                                                                                                                                                                                                                                                                                                                                                                          |
| <p>Barba et al<br/>2015<br/>Spain</p> | <p>All patients admitted under internal medicine to Spanish public healthcare sector 1<sup>st</sup> Jan 2005 to 31<sup>st</sup> Dec 2013</p> <p>5275139 discharges</p> <p>Multi-centre study<br/>Mean age approx. 72 yr<br/>52.5% male</p>     | <p>Prolonged LOS was defined as &gt; 30 days</p> <p>3.2% had prolonged LOS but accounted for 17.4% of inpatient days</p> <p>Did not adjust for multiple co-variates</p>                                                                                            | <p>Prolonged hospitalisation was associated with</p> <ul style="list-style-type: none"> <li>• Younger age</li> <li>• Male gender</li> <li>• Elements of the Charlson comorbidity index</li> <li>• Palliative care consultation</li> <li>• Surgery</li> <li>• Discharge to a post-acute-care facility</li> </ul>                                                                                                                                                                                                                                                                                                                                                                                                                                                                          |
| <p>Batani et al<br/>2018<br/>USA</p>  | <p>1928 patients with disseminated malignancy who underwent abdominal surgery for bowel obstruction 2007-2012</p> <p>Multi-centre study</p> <p>55% female<br/>Mean age = 63 ±13 years</p>                                                      | <p>Prolonged hospitalisation was defined as a LOS ≥ 75<sup>th</sup> centile (≥ 20 days)</p>                                                                                                                                                                        | <p>Prolonged LOS was <b>not</b> associated with:</p> <ul style="list-style-type: none"> <li>• ASA status</li> <li>• CCI score</li> </ul> <p>Modified frailty index</p>                                                                                                                                                                                                                                                                                                                                                                                                                                                                                                                                                                                                                   |
| <p>Belkin et al<br/>2019<br/>USA</p>  | <p>3021 patients who underwent thoracic endovascular aortic repair 2005-2015</p> <p>2163 for aneurysm<br/>858 for aortic dissection</p> <p>Multi-centre study</p> <p>Male gender comprised 60.5% dissection and 55.0% of aneurysm patients</p> | <p>Prolonged LOS was defined as &gt; 75<sup>th</sup> centile (11 days)</p> <p>Median post-operative LOS was</p> <ul style="list-style-type: none"> <li>• 6 (3-11) days overall</li> <li>• 7 (4-13) days for dissection</li> <li>• 5 (3-10) for aneurysm</li> </ul> | <p>Variables associated with prolonged LOS</p> <p>Dissection</p> <ul style="list-style-type: none"> <li>• ASA score</li> <li>• Days to operation</li> <li>• Stroke / TIA</li> <li>• Fail to wean &gt; 48 hr</li> <li>• Number of sepsis events</li> <li>• Pneumonia</li> <li>• Re-operation</li> </ul> <p>Aneurysm</p> <ul style="list-style-type: none"> <li>• Diabetes</li> <li>• Dialysis</li> <li>• Emergency surgery</li> <li>• Days to operation</li> <li>• Dependent status</li> <li>• Cardiac history</li> <li>• Transfusion required</li> <li>• Stroke / TIA</li> <li>• Fail to wean &gt; 48 hr</li> <li>• Number of DVT events</li> <li>• Number of sepsis events</li> <li>• Pneumonia</li> <li>• Reintubation</li> <li>• Postoperative AKI</li> <li>• Re-operation</li> </ul> |
| <p>Carter et al<br/>2015<br/>USA</p>  | <p>9593 laparoscopic bypass surgical operations in calendar year 2011</p> <p>Multi-centre study</p> <p>80% female<br/>Mean age = 44 ± 12 years</p>                                                                                             | <p>Median LOS 2 days (range 0-544)</p> <p>26% required ≥ 3 days hospitalisation</p>                                                                                                                                                                                | <p>Longer hospitalisation was associated with:</p> <ul style="list-style-type: none"> <li>• Diabetes</li> <li>• Chronic obstructive pulmonary disease</li> <li>• Bleeding disorder</li> <li>• Increased serum Cr</li> <li>• Low albumin</li> <li>• Resident involvement in case</li> <li>• Prolonged OR time</li> </ul> <p>Longer hospitalisation was not associated with gender, age or BMI</p>                                                                                                                                                                                                                                                                                                                                                                                         |

|                                       |                                                                                                                                                                            |                                                                                                                                   |                                                                                                                                                                                                                                                                                                                                                                                                                                                                                                                                                              |
|---------------------------------------|----------------------------------------------------------------------------------------------------------------------------------------------------------------------------|-----------------------------------------------------------------------------------------------------------------------------------|--------------------------------------------------------------------------------------------------------------------------------------------------------------------------------------------------------------------------------------------------------------------------------------------------------------------------------------------------------------------------------------------------------------------------------------------------------------------------------------------------------------------------------------------------------------|
| Casillas-Berumen et al<br>2018<br>USA | 1172 patients undergoing open abdominal aortic aneurysm repair 2012 – 2014<br><br>Multi-centre study<br><br>74% male<br>54% older than 70 years<br>Mean age = 70 ± 9 years | Above 75 <sup>th</sup> centile (>10 days)                                                                                         | Prolonged LOS was associated with <ul style="list-style-type: none"> <li>• Visceral revascularisation</li> <li>• Not from home admission</li> <li>• Nature of the aneurysm</li> <li>• Chronic obstructive pulmonary disease</li> <li>• Age &gt; 70 years</li> </ul>                                                                                                                                                                                                                                                                                          |
| Dasenbrock et al<br>2015<br>USA       | 11,510 patients undergoing craniotomy for resection of brain tumour 2007-2013<br><br>Multi-centre study<br><br>55.8% aged > 56 yrs<br><br>53.2% female                     | Prolonged LOS > 75 <sup>th</sup> centile (≥ 8 days)<br><br>Median (IQR) hospital LOS = 4 (3-8) days<br><br>27.7% had LOS ≥ 8 days | Prolonged LOS was associated with <ul style="list-style-type: none"> <li>• Age &gt; 70 years</li> <li>• ASA ≥ 3 designation</li> <li>• Functional status</li> <li>• IDDM</li> <li>• Haematological co-morbidity</li> <li>• Pre-operative hypoalbuminemia</li> <li>• Post-operative complications <ul style="list-style-type: none"> <li>○ Pulmonary embolism</li> <li>○ Pneumonia</li> <li>○ Urinary tract infection</li> </ul> </li> </ul> <p>Much of the variation in LOS was attributable to baseline co-variates suggesting it may not be modifiable</p> |
| Dunn et al<br>2015<br>USA             | 2004 patients undergoing total shoulder arthroplasty 2005-2011<br>Multi-centre study<br><br>57 % women                                                                     | Mean LOS after surgery = 2.2 (1.7) days<br><br>9% stayed ≥ 4 days                                                                 | Los was treated as a continuous variable in the statistical analysis                                                                                                                                                                                                                                                                                                                                                                                                                                                                                         |
| Lakomkin et al<br>2019<br>USA         | 2170 patients undergoing surgical resection of spinal tumour between 2008 and 2014<br>54% were male<br>Mean aged was 57 ± 16 yrs<br>Multi-centre study                     | Prolonged LOS defined as above 75 <sup>th</sup> centile                                                                           | Prolonged LOS was associated with <ul style="list-style-type: none"> <li>• Charlson co-morbidity index</li> <li>• Modified frailty index</li> </ul>                                                                                                                                                                                                                                                                                                                                                                                                          |
| Inneh et al<br>2015<br>USA            | 1486 patients undergoing total hip arthroplasty 2011-2014<br>Age range 21-93 years<br>Mean age 62<br><br>56% were females<br><br>Single centre study                       | Post-operative LOS ranged 1-27 days (mean 3.5 days)<br><br>32% had extended LOS > 3 days                                          | Independent associations with prolonged LOS included: <ul style="list-style-type: none"> <li>• SES status</li> <li>• Female gender</li> <li>• Age ≥ 65 years</li> <li>• Obesity</li> <li>• ASA score &gt; 2</li> <li>• Length of surgery</li> <li>• General anaesthesia</li> <li>• Disorders of <ul style="list-style-type: none"> <li>○ Circulatory system</li> <li>○ Respiratory system</li> <li>○ Genito-urinary system</li> </ul> </li> </ul>                                                                                                            |
| Kaoutzanis et al<br>2015<br>USA       | 28269 cases of ventral/incisional hernia repair 2009-2010 in patients ≥ 18years<br><br>Mean age 55 years<br>51.6% female<br><br>Multi-centre study                         | 25% had LOS ≥ 3 days<br><br>1% had LOS > 14 days                                                                                  | Independent associations with prolonged LOS included: <ul style="list-style-type: none"> <li>• Older age</li> <li>• Functional status</li> <li>• Alcohol abuse</li> <li>• ASA status</li> <li>• Prior operation in past 30 days</li> <li>• History of chronic obstructive pulmonary disease</li> <li>• History of congestive heart failure</li> </ul>                                                                                                                                                                                                        |

|                                 |                                                                                                                                                                                                             |                                                                                    |                                                                                                                                                                                                                                                                                                                                                                                                                                                                                                                                            |
|---------------------------------|-------------------------------------------------------------------------------------------------------------------------------------------------------------------------------------------------------------|------------------------------------------------------------------------------------|--------------------------------------------------------------------------------------------------------------------------------------------------------------------------------------------------------------------------------------------------------------------------------------------------------------------------------------------------------------------------------------------------------------------------------------------------------------------------------------------------------------------------------------------|
|                                 |                                                                                                                                                                                                             |                                                                                    | <ul style="list-style-type: none"> <li>• Operation time</li> </ul> Emergency case                                                                                                                                                                                                                                                                                                                                                                                                                                                          |
| Lakomkin et al<br>2017<br>USA   | 6121 patients undergoing revision total hip arthroplasty Oct 2006 to Oct 2013<br><br>Mean age = 66 ± 13 years<br>55.3% female<br><br>Multi-centre study                                                     | Above 75 <sup>th</sup> centile or at least 5 days                                  | Prolonged LOS was associated with <ul style="list-style-type: none"> <li>• Female gender</li> <li>• Operative time</li> <li>• Functional dependence</li> <li>• ASA score</li> <li>• General anaesthesia</li> <li>• Femoral revision</li> </ul> Charlson co-morbidity index                                                                                                                                                                                                                                                                 |
| McGirt et al<br>2017<br>USA     | 6921 patients undergoing elective lumbar spine surgery<br><br>Patients > 18 years<br>Single centre study                                                                                                    | Extended LOS was defined as ≥ 7 days<br><br>4.2% of patients required extended LOS | Prolonged LOS was associated with <ul style="list-style-type: none"> <li>• Non spinal fusion</li> <li>• ASA classes</li> <li>• Age</li> <li>• Diabetes</li> <li>• Independence with ambulation</li> </ul>                                                                                                                                                                                                                                                                                                                                  |
| Menendez et al<br>2015<br>USA   | 40869 patients undergoing elective arthroplasty<br><br>Age ≥ 18 years old<br><br>Jan – Dec 2011<br><br>Mean age approx. 70 years<br><br>Multi-centre study<br>Approx. 62% female                            | Prolonged LOS > 75 <sup>th</sup> centile                                           | Prolonged LOS was associated with <ul style="list-style-type: none"> <li>• Female</li> <li>• Increasing age</li> <li>• Congestive heart failure</li> <li>• Renal failure</li> <li>• Chronic obstructive pulmonary disease</li> <li>• Pre-operative oedema</li> <li>• Post-operative complications</li> </ul>                                                                                                                                                                                                                               |
| Petis et al<br>2016<br>Canada   | 120 patients undergoing total hip arthroplasty<br><br>Mean age approx. 66 years<br><br>Single centre study<br>64.2% female                                                                                  | Prolonged LOS defined as > 48 hr<br><br>Mean LOS = 54.3 ± 26.4 hr                  | Prolonged LOS was associated with: <ul style="list-style-type: none"> <li>• Time to up and go</li> </ul> Prolonged LOS was not associated with <ul style="list-style-type: none"> <li>• Age</li> <li>• Body mass index</li> <li>• Mean procedure time</li> </ul> Mean time in post-anaesthetic care                                                                                                                                                                                                                                        |
| Velagapudi et al<br>2018<br>USA | 678545 hospitalisations for primary percutaneous coronary intervention to ST-elevation myocardial infarction between 2005 to 2014<br><br>Multi-centre study<br><br>Mean age = 59.6 yrs<br><br>25.4% females | Median (IQR) LOS = 3.0 (2.0-3.0) days<br><br>LOS > 3.0 days occurred in 24.1%      | Prolonged LOS was associated with: <ul style="list-style-type: none"> <li>• Age ≥ 65 years</li> <li>• Female gender</li> <li>• Hospital size and location</li> <li>• Heart failure</li> <li>• Peripheral arterial disease</li> <li>• Chronic lung disease</li> <li>• Chronic kidney disease</li> <li>• Atrial fibrillation</li> <li>• Coagulopathy</li> <li>• Depression</li> <li>• Anterior STEMI</li> <li>• stroke</li> <li>• coagulopathy / bleeding vascular complication</li> </ul>                                                   |
| Quintana et al<br>2015<br>Spain | 3276 episodes of exacerbation of chronic obstructive pulmonary disease between June 2008 and Sep 2010<br><br>Multi-centre study                                                                             | Prolonged LOS defined as > 9 days                                                  | Prolonged LOS was associated with: <ul style="list-style-type: none"> <li>• FEV1 &lt; 50</li> <li>• Admission in past 12 months</li> <li>• Prior home oxygen or non-invasive ventilation</li> <li>• Number of treatments</li> <li>• Baseline physical activity</li> <li>• ICU admission</li> <li>• PaCO<sub>2</sub> &gt; 65 vs ≤ 45 mmHg</li> </ul> Prolonged LOS was not associated with <ul style="list-style-type: none"> <li>• age ≥ 70 years</li> <li>• gender</li> <li>• CCI</li> <li>• Intravenous antibiotics</li> </ul> Diuretics |



|                                   |                                                                                                                                                                                                           |                                                                                                                                                                                                                                                                                          |                                                                                                                                                                                                                                                                                                                                                                                  |
|-----------------------------------|-----------------------------------------------------------------------------------------------------------------------------------------------------------------------------------------------------------|------------------------------------------------------------------------------------------------------------------------------------------------------------------------------------------------------------------------------------------------------------------------------------------|----------------------------------------------------------------------------------------------------------------------------------------------------------------------------------------------------------------------------------------------------------------------------------------------------------------------------------------------------------------------------------|
| Wang et al<br>2017<br>USA         | 334 patients undergoing lower limb vascular bypass procedures between 2010 and 2015<br><br>Single centre study<br><br>Mean age $66.4 \pm 12.4$ yr<br>64.7% males                                          | Mean LOS = $15.7 \pm 12.2$ days<br><br>Prolonged LOS was defined as > 7 days<br>247 (74.0%) had prolonged LOS<br><br>The LOS group stayed on average approximately 2 weeks longer than the non-prolonged LOS group ( $19.7 \pm 12.3$ vs. $4.9 \pm 1.6$ days, respectively, $P < 0.001$ ) | Prolonged LOS was associated with: <ul style="list-style-type: none"> <li>• Urgent surgery</li> <li>• Critical limb ischemia</li> <li>• Return to the operating room</li> <li>• Use of a vein graft</li> <li>• The need for anticoagulation at discharge</li> </ul>                                                                                                              |
| Winemaker et al<br>2015<br>Canada | 1459 patients undergoing elective total knee (61.7%) and total hip (38.3%) replacement between Apr 2011 and Mar 2012<br>Single centre study<br><br>57.5% female<br>Median age = 67 (52-82) yr             | LOS was characterised as $\leq 3$ , 4, or $\geq 5$ days<br><br>516 (35.4%) stayed $\geq 5$ days                                                                                                                                                                                          | Longer LOS was associated with: <ul style="list-style-type: none"> <li>• Female gender</li> <li>• Hip &gt; knee replacement</li> <li>• Age <math>\geq 75</math> years</li> <li>• ASA 3 or 4</li> <li>• Number of cardio-vascular and renal co-morbidities</li> </ul> Current smoker                                                                                              |
| Zhan et al<br>2019<br>China       | 303 patients aged $\geq 60$ yr undergoing first time elective open posterior lumbar fusion between Dec 2012 and Dec 2017<br>Single centre study<br><br>Mean age = $67.0 \pm 5.5$ yr<br><br>54.8% were men | Mean LOS = $18.5 \pm 11.8$ days<br>Range = 7-103 days<br><br>83 (27.4%) had an extended LOS ( $\geq 75^{\text{th}}$ centile)                                                                                                                                                             | Extended LOS was associated with: <ul style="list-style-type: none"> <li>• Age</li> <li>• Pre-operative waiting time</li> <li>• Pulmonary complications</li> <li>• Diabetes</li> <li>• Intra-operative blood loss</li> <li>• Multi-level procedure</li> <li>• Major complications</li> <li>• Infectious complications</li> <li>• Multiple surgeries</li> </ul> Surgical bleeding |
